1 **Preparing future STEM faculty nationwide through flexible teaching professional**  
2 **development**

3 B. B. Goldberg<sup>1\*,¶</sup>, D. Bruff<sup>2\*</sup>, R. Greenler<sup>3</sup>, K. Barnicle<sup>4</sup>, N. Green<sup>5,#a</sup>, L. E. P. Campbell<sup>6</sup>, S. L. Laursen<sup>7</sup>,  
4 M. Ford<sup>8,#b</sup>, A. Serafini<sup>9</sup>, C. Mack<sup>10,#c</sup>, T. Carley<sup>11</sup>, C. Maimone<sup>12</sup>, H. Campa III<sup>13</sup>

5 <sup>1</sup> Department of Physics and Astronomy, Northwestern University, Evanston, IL, USA

6 <sup>2</sup> Center for Teaching, Vanderbilt University, Nashville, TN, USA

7 <sup>3</sup> CIRTl Network, University of Wisconsin–Madison, Madison, WI, USA

8 <sup>4</sup> CIRTl Network, University of Wisconsin–Madison, Madison, WI, USA

9 <sup>5</sup> Green Scientific and Educational Consulting

10 <sup>6</sup> Department of Physics & Astronomy, Vanderbilt University, Nashville, TN, USA

11 <sup>7</sup> Ethnography & Evaluation Research, University of Colorado Boulder, Boulder, CO, USA

12 <sup>8</sup> Northwestern IT Research Computing Services, Northwestern University, Evanston, IL, USA

13 <sup>9</sup> Department of Educational Foundations, Leadership & Technology, Auburn University, Auburn,  
14 Alabama, USA

15 <sup>10</sup> Department of Physics & Astronomy, Vanderbilt University, Nashville, TN, USA

16 <sup>11</sup> Department of Geology and Environmental Geosciences, Lafayette College, Easton, PA, USA

17 <sup>12</sup> Northwestern IT Research Computing Services, Northwestern University, Evanston, IL, USA

18 <sup>13</sup> Graduate School and Department of Fisheries and Wildlife, Michigan State University, East  
19 Lansing, MI, USA

20 #<sup>a</sup> Current address: Associate Director of the Explorer's Guide to Biology at The Science

21 Communication Lab

22 #<sup>b</sup> Current address: School of Engineering & Technology, University of Washington, Tacoma,

23 Tacoma, WA, USA

24 #<sup>c</sup> Current address: Machtfit GmbH, Berlin, Germany

25 ¶ Corresponding author.

26 Email: [bennett.goldberg@northwestern.edu](mailto:bennett.goldberg@northwestern.edu)

27 \* These authors contributed equally to the work.

## 28 **Abstract**

29 We report on a five-year initiative that has prepared thousands of future STEM faculty around the  
30 world to adopt evidence-based instructional practices by participating in two massive open online  
31 courses (MOOCs) and facilitated in-person learning communities. This novel combination of  
32 asynchronous online and coordinated, structured face-to-face learning community experiences  
33 provides flexible options for STEM graduate students and postdoctoral fellows to pursue teaching  
34 professional development, while leveraging the affordances of educational technologies and the  
35 geographically clustered nature of this target learner demographic. A total of 14,977 participants  
36 enrolled in seven offerings of the introductory course held 2014-2018, with 1,725 participants from  
37 approximately 60 countries completing at an average course completion rate of 13%. The  
38 preparation of future STEM faculty makes an important difference in establishing high-quality  
39 instruction that meets the diverse needs of all undergraduate students, and the initiative described  
40 here can serve as a model for increasing access to such preparation.

41 *Keywords: STEM, Teaching, Graduate Student Professional Development, MOOCs*

## 42 **Introduction**

43 There is recognition [1] that evidence-based, student-centered instruction in science, technology,  
44 engineering, and mathematics (STEM) increases undergraduate student learning and success in  
45 STEM generally [2] and reduces the performance disparities between majority and minority  
46 students in STEM [3, 4, 5, 6]. There is also evidence that current [7] and future [8] faculty who  
47 engage in effective professional development go on to implement evidence-based pedagogies in  
48 their classes. These findings are the basis for pedagogical professional development programs  
49 offered by university teaching centers, graduate schools, and postdoctoral training initiatives [9].

50

51 Future STEM faculty, that is, doctoral students and postdocs who seek academic careers, face  
52 particular challenges in learning about and adopting evidence-based teaching practices, including  
53 limited opportunities and lack of advisor support for pedagogical professional development [10, 11,  
54 12, 13]. Despite this, graduate students and postdocs may be more receptive than current faculty to  
55 explore and implement evidence-based teaching practices because they are in the process of  
56 learning the standards of academia, developing scientific and teaching practices in their discipline,  
57 and are preparing for competitive academic positions [14]. Encouragingly, future STEM faculty who  
58 do participate in moderate- or high-engagement pedagogical professional development (greater  
59 than 25 hours of participation) report significantly improved self-efficacy as instructors and  
60 significantly higher adoption of evidence-based teaching practices [8] and perform as well or better  
61 in research [15].

62

63 To provide such professional development to future STEM faculty, and thereby improve  
64 undergraduate education in the U.S. more broadly, the Center for the Integration of Research,  
65 Teaching, and Learning (CIRTL) Network, which currently consists of 43 research universities

66 across the United States and Canada, provides structured pedagogical professional development  
67 programs for graduate students and postdocs at individual campuses and through cross-Network  
68 programming [16, 17, 18]. Many of these programs are structured as in-person or virtual,  
69 synchronous or asynchronous learning communities [19, 17], where participants meet to learn  
70 from and with each other as they pursue shared learning goals [20]. The Network also serves as a  
71 community of practice [21] for leaders of future STEM faculty development to share strategies and  
72 expertise and to co-develop and implement network-wide programs.

73  
74 In 2013, a series of CIRTl Network conversations on emerging models for future STEM faculty  
75 development led a small group of faculty, administrators, and researchers to propose a new  
76 initiative centered on the use of Massive, Open Online Courses (MOOC). Interest in this new form of  
77 online education accelerated rapidly [22], with educators and researchers exploring the potential  
78 for online tools such as videos, discussions, and peer assessments to support learning for thousands  
79 of concurrent students [23]. Interestingly, research shows that the more successful MOOCs have  
80 been associated with targeted rather than general audiences [24].

81  
82 In this context of pedagogical experimentation and with funding from the National Science  
83 Foundation, we sought to design, deliver, and evaluate the use of MOOCs on evidence-based  
84 undergraduate STEM teaching for future faculty pedagogical professional development. This in  
85 itself was not novel; other MOOCs developed in the same time frame also had this focus [25].  
86 Inspired by instructors who “wrapped” campus-based courses around existing MOOCs [26] and  
87 informed by the CIRTl Network’s experience with campus-based and virtual learning communities,  
88 we planned the online courses to be delivered in three different modes to meet the diverse learning  
89 needs of future faculty : (1) as stand-alone MOOCs for online participants, (2) as open educational  
90 resources for use by individuals or by campus-based professional development programs, and (3)

91 as blended online and in-person experiences constructed with what we called MOOC-Centered  
92 Learning Communities, or MCLCs [27]. By inviting colleagues around the CIRTl Network and  
93 beyond to host MCLCs of participants in the online courses and by providing those local facilitators  
94 with learning guides to support their local in-person meetings, we designed a novel structure that  
95 has enabled us to meet the professional development needs of thousands of future STEM faculty  
96 worldwide.

## 97 **Materials and methods**

98 In 2013-2014, we launched an eight-week introductory MOOC, *Introduction to Evidence-based*  
99 *Undergraduate STEM Teaching*, followed by a second eight-week MOOC, *Advanced Learning*  
100 *Through Evidence-Based STEM Teaching*, in 2015-2016. Each course consists of six 3-to-5-hour  
101 modules, each featuring instructional videos, discussion prompts, recommended readings, and a  
102 quiz, and three peer-graded assessments (PGAs) per course. The introductory course examines the  
103 fundamentals of learning and learning design, including learning objectives, assessment, and active  
104 learning, culminating with a final PGA in which participants develop a sample lesson plan  
105 incorporating these core elements. The advanced course delves deeper into evidence-based  
106 teaching practices, including peer instruction, cooperative learning, and inquiry-based labs. The  
107 final PGA in the second course requires participants to develop a teaching philosophy statement  
108 that demonstrates their understanding of and preferences among the teaching practices they have  
109 learned. Each course is offered once or twice a year on the edX platform.

110 To foster greater engagement and learning, we encouraged participants in the online courses to join  
111 or start an MCLC. These learning communities are typically hosted on university campuses, and  
112 typically meet weekly to share, discuss, and contextualize what participants are learning in the  
113 online course. Depending on local needs, MCLCs can be part of credit-bearing courses, non-credit

114 seminars, or an informal set of meetings among peers or colleagues. Each MCLC has a facilitator  
115 who regularly convenes the community and plans discussions or other activities for the in-person  
116 meetings. To support MCLC facilitators, we provided an “MCLC Facilitators’ Guide” that includes  
117 learning goals and objectives for online and in-person sessions; overviews of online videos,  
118 discussion prompts to engage participants with course content, and assignments; and 3-7  
119 suggested activities with facilitator notes for each module that complement and extend the online  
120 materials. Our project team markets the potential of MCLCs for professional development  
121 associated with teaching and learning and recruits MCLC facilitators at CIRTl Network campuses  
122 as well as through our respective networks to draw a diverse and international community.

123 The project website, <https://www.stemteachingcourse.org/>, makes freely available the course  
124 content, including videos, accompanying slides, discussion prompts, and instructions for each PGA.  
125 The project also has a public YouTube channel, <https://www.youtube.com/user/cirtlmooc>,  
126 featuring all course videos organized by course module. All materials are made available under a  
127 Creative Commons 4.0 Attribution-Noncommercial license to facilitate reuse by anyone interested  
128 in STEM teaching or pedagogical professional development.

## 129 **Results**

### 130 **Outcomes of participation and engagement**

131 To understand the impact of the project, we examined the learner experience: Who engaged in the  
132 course, how they engaged, what motivated them, and what they thought of it. A total of 14,977  
133 participants enrolled in seven offerings of the introductory course held 2014-2018, with 1,725  
134 participants from approximately 60 countries completing. The average course completion rate of  
135 13% is more than double the rate of most non-professional and non-degree MOOCs [28, 29, 24].

136 Overall, 5,320 total participants registered for the four offerings to date of the second MOOC, with  
 137 291 completers and a course-averaged 6.3% completion rate (Table 1).

138 **Table 1: Participation, learner engagement and completion for 11 course offerings from**  
 139 **2014-2018.**

|                                                        | Introductory Course | Advanced Course |
|--------------------------------------------------------|---------------------|-----------------|
| Offerings                                              | 7 instances         | 4 instances     |
| Time Span                                              | 2014-2018           | 2016-2018       |
| Total Enrollment                                       | 14,977              | 5,320           |
| Total Completers                                       | 1,725               | 291             |
| Mean Course Completion Rate (% of enrolled)**          | 13%                 | 6%              |
| Total Learners*                                        | 3,259               | 625             |
| Mean % of Learners who completed the course**          | 64%                 | 49%             |
| Mean % of Learners auditing only**                     | 32%                 | 30%             |
| Mean % of Learners engaged in all six course modules** | 65%                 | 57%             |
| Overall Learners as % of Enrolled***                   | 22%                 | 12%             |

140 Table 1 legend.

141 \* ‘Learners’ complete at least two quizzes, at least one peer graded assignment, or watch course videos from  
142 at least three of the six course modules. ‘Auditors’ complete 3 or fewer quizzes and no peer-graded  
143 assessments. These definitions are discussed further in the text and online supplementary materials.

144 \*\*Averaged across courses

145 \*\*\*Averaged across students

146

147 We analyzed participants’ course activity, engagement, and outcomes in the introductory MOOC  
148 based on data from the online course platforms, and voluntary pre- and post-course surveys [30].  
149 Further analysis is available in the online supplementary materials.

150 Course completion required participants to pass quizzes, PGAs, or a combination thereof. These  
151 assessments required understanding of and ability to apply the material from the course videos and  
152 readings. While completion is one marker of participant engagement in MOOCs, we encouraged  
153 participants to make use of the course materials in whatever manner would best support their  
154 development. In assessing engagement, we focused on those who engaged in significant ways with  
155 the course materials, as a proxy for learning and gains in knowledge. We define “learners” to be  
156 participants who complete at least two quizzes, complete a PGA, or watch videos from at least three  
157 of the six course modules. These thresholds are based on drop-offs observed in participant activity  
158 as a function of both video watching and assignment completion (Fig 1a). (Note that the course  
159 included a module “0”, introducing the course.) As others have also found, course engagement  
160 drops off quickly after the first and second weeks [31, 32].

161 **Fig 1: Learner engagement v. video watching, assignments, and weeks.**

162 **Fig 1 (a)** Joint histogram of enrolled in the introductory MOOC by total number of modules/course  
163 weeks in which they participated by watching videos (vertical axis) or taking quizzes (horizontal  
164 axis). The outlined region approximately separates “learners” from disengaged non-learners; a



165 small number (31 or 1%) of learners who completed a PGA but few quizzes may not fall within the  
166 outlined region. **Fig 1 (b)** Percent of total enrolled who participated during each module/course  
167 week by watching more than one video that week.

168 Learners represented 22% of those enrolled in the introductory course. Learners fell into two main  
169 groups: completers (64% of learners, or 14% of all enrolled) who participate in quizzes and peer-  
170 graded assignments, and auditors (our term, representing 32% of learners, 7% of enrolled) who  
171 primarily watch course videos (see [33]). As seen in Fig 1(b), non-learners tended to be active in  
172 the first two weeks of the course, but later disengaged from the course. About half the auditors did  
173 not meet the course completion criteria but still participated in all six of the course modules by  
174 watching a module video or taking the module quiz. Thus, 78% of the learners engaged  
175 continuously with the material throughout the course, indicating a high rate of retention beyond  
176 the first two weeks.

177 Voluntary pre- and post-course surveys inquired about intention to complete the course, learning  
178 gains, motivations, time spent, involvement in learning communities, demographics and other  
179 information about our participants, their behaviors and learning outcomes. Demographic data  
180 about course participants is only available through these surveys.

181

182 For seven instances of the introductory course, 3,884 students (26% of enrolled) took the pre-  
183 course survey. In a subset of the data where we can link participant demographics to course  
184 engagement behaviors, pre-course survey respondents included 57% of learners in the course;  
185 conversely, 55% of pre-course survey respondents went on to engage with the course as learners.  
186 This overlap implies that pre-course survey respondents are a very good, but not perfect,  
187 representation of learners. Similarly, at the end of the course, half (55%) of the completers  
188 responded to the post-course survey; among post-survey respondents, 84% completed the course

189 and an additional 8% engaged during all six modules/weeks. Results from the post-course survey  
190 are, therefore, very reflective of the experiences and demographics of course completers.

191  
192 PhD students and postdocs made up 50% of the pre-course survey respondents and 59% of the  
193 post-course survey respondents who indicated their status (98.8% and 90.3% respectively),  
194 representing by far the largest audience segment of both learners and completers. Faculty made up  
195 an additional 20% and 19% of the pre- and post-course survey respondents respectively. Nearly all  
196 (91%) of the pre-course survey respondents indicated their disciplines from STEM or Social,  
197 Behavioral, and Economic Sciences (SBES) fields. Thus, we are reaching our designed audience of  
198 STEM PhDs and postdocs, 86% of whom reported preparing for academic careers.

199  
200 Overall, 34% of pre-course survey respondents completed the course. Among them, postdoctoral  
201 researchers completed at a higher rate of 39% compared to 32% for other participants ( $p = 0.005$ ).  
202 Those who indicated on the pre-course survey that they intended to pursue an academic career  
203 (74% of respondents) completed at a significantly higher rate, 37%, than those who did not, 23% ( $p$   
204  $\ll 0.001$ ).

205  
206 Post-course survey respondents rated their retrospective gains as high in four areas: *confidence of*  
207 *implementing teaching and learning strategies covered in class, interest in taking or planning to take*  
208 *additional classes related to teaching and learning, interest in discussing teaching and learning with*  
209 *colleagues and friends, and confidence that they understand the material covered* all as higher than  
210 4.0 on a 5-point scale where 5 is “*Great gains.*” Participants who responded to both pre- and post-  
211 course surveys also reported increased familiarity with the key concepts of summative assessment,  
212 leveraging diversity, formative assessment, backwards design, and learning objectives that were  
213 taught in the course (Fig 2).

214

215 **Fig 2: Increase in average reported familiarity with pedagogical topics from course**  
216 **participants.**

217

218 **Fig 2 (a)** Average responses of pre- and post-course respondents, unpaired. Error bars represent  
219 one standard deviation. **Fig 2 (b)** Average of paired differences for the 520 respondents who took  
220 both the pre- and post-course surveys for the first two instances of the course where responses can  
221 be linked. Error bars represent the 99% confidence interval.

222

223 The high rate of learner completion, especially among those who self-identified as future STEM  
224 faculty, indicated strong motivation of participants and a course design that matches learners' time  
225 commitment, work level, availability and motivation. These conclusions are corroborated by self-  
226 reported satisfaction of post-course survey respondents, 97% of whom agreed that the course  
227 improved their ability to teach, 93% were either "satisfied" or "extremely satisfied" with the course,  
228 and 97% would "recommend [the course] to others" [34].

## 229 **Learning community engagement**

230 Many learners engaged in our blended model of delivery: 134 institutions have hosted at least one  
231 in-person learning community, and many have hosted multiple times, yielding 236 total MCLCs as  
232 of Spring 2018. MCLCs had on average 12 participants, who were largely (75%) STEM PhD  
233 graduate students and postdocs, and who completed the course at a high rate (65%), as estimated  
234 by MCLC facilitators.

235 We do not have data on how many learners were in MCLCs. Based on data about their intentions  
236 [35], our best estimate is that between 20-40% of learners were in MCLCs. The top reasons they

237 wished to engage in local, in-person learning were the opportunities to *interact with peers* (35%), to  
238 *discuss course materials and assignments* (32%), to *meet others interested in teaching and learning*  
239 *(31%), and to receive feedback on my teaching and learning practices* (28%). Among post-course  
240 survey respondents, 34% reported participating in an MCLC, and those who did had strong  
241 outcomes: 97% were learners and 87% completed the course, representing 19% of all completers.

## 242 **Feedback from learning community facilitators**

243 Survey responses and interviews with MCLC facilitators provided valuable feedback on the  
244 structure and efficacy of the MOOCs broadly and the MCLCs in particular. Their thoughtful  
245 feedback informed substantial revisions of the introductory and advanced MOOCs. In their MCLCs,  
246 facilitators reported using the facilitator guides and finding most components to be useful (~75%);  
247 they reviewed it to get ideas and used different activities to meet the needs of their particular  
248 group. Activities involving reflection, discussion or extension of course material were well received,  
249 while those that relied on participants' past teaching experience, or required peer feedback,  
250 additional reading, or reflection outside the MCLC meeting, were generally less successful. Both  
251 facilitators with prior expertise in the MOOC content and those without prior knowledge reported  
252 success in leading MCLCs: experts tended to prepare MCLCs as mini-courses enriched with their  
253 own content and activities, while novices conducted MCLCs in the form of peer-led study groups,  
254 largely drawing on the MOOC materials and the facilitator guide. That novice and expert leaders  
255 can successfully lead MCLCs with the support of the Guide, makes the MCLC model sustainable and  
256 adaptable in numerous settings.

257 Most (45 of 51) facilitator survey respondents reported they would facilitate an MCLC again, saying,  
258 for example, *"I enjoyed facilitating the MOOC, learning from it, and sharing my experience with the*  
259 *participants in our learning community,"* and *"It's one of my favorite things to do, even though I am*  
260 *doing it as a volunteer."*

## 261 **Open educational resource engagement**

262 In addition to the stand-alone MOOC and MCLC delivery modes, open educational resources (OER)  
263 are intended to encourage adoption and adaptation broadly and done in the spirit of collaboration  
264 inherent in evidence-based teaching strategies. By making access as broad and simple as possible,  
265 we made the tradeoff of limiting our ability to monitor participants and facilitators who have  
266 accessed our content. Multiple colleagues and educators expressed an interest in using our course  
267 materials for professional development programs at their institutions. In the first three years our  
268 ~130 videos were viewed 60,540 times outside the course. Examples of how educators have used  
269 our materials include: developing or supporting teaching certificate programs, redesigning  
270 curricula, incorporating additional materials into existing educational workshops or for credit  
271 courses, and providing online professional development training.

## 272 **Discussion**

273 Through multiple offerings of two MOOCs on evidence-based undergraduate STEM teaching,  
274 intentional support for facilitated MCLCs, and open access to course materials, we have met a need  
275 among graduate students and postdocs for pedagogical professional development that often goes  
276 unmet through traditional on-campus resources and events [36]. A number of key factors led to this  
277 result.

278 Our target audience of STEM graduate students and postdocs have clearly identified professional  
279 development goals and are geographically clustered at research universities. This enabled the  
280 formation of local MCLCs, since potential participants studied and worked in proximity to each  
281 other. Having local MCLCs at universities also made easier publicity and recruitment for our  
282 blended delivery mode, since the opportunity to join MCLCs could be advertised by supportive  
283 university faculty and staff members, graduate schools, departments and centers for learning and

284 teaching. Those faculty and staff also made ready facilitators for MCLCs. Their self-reported  
285 experience and expertise, and the similar professional goals of participants, lent MCLCs a structure  
286 and coherence that distinguished them from the ad hoc student meet-ups that are common in many  
287 MOOCs, leading to greater course completion rates by MCLC participants.

288 Participants had flexible options for engaging with course materials and resources. Some learners  
289 completed the courses by submitting quizzes and peer-graded assignments, some audited the  
290 courses by consistently watching videos, while other learners viewed course videos in an ad hoc  
291 manner on YouTube and the project website. MCLCs provided a professional development option  
292 for those who also wanted an in-person experience. For graduate students and postdocs often  
293 constrained by time, advisor priorities and the need to focus on research, these options enabled  
294 motivated future faculty to seek out and obtain pedagogical professional development on their own  
295 terms.

296 Our MOOC initiative was launched from, developed by, and continues to be hosted by an existing  
297 network of STEM faculty, educators, administrators, and educational developers, the CIRTLL  
298 Network. Long-term sustainment is an unfortunately rare outcome of NSF-funded educational  
299 initiatives [37]. The CIRTLL Network brought together the initial team that developed the MOOCs; it  
300 provided a range of STEM education practitioners and researchers who contributed to the course  
301 content through interviews, resource sharing, module development, and feedback; and Network  
302 institutions hosted approximately one third of the MCLCs. Individuals from outside the CIRTLL  
303 Network contributed in significant ways as well, particularly as MCLC facilitators, but the existing  
304 network functioned as a community of practice that enabled the initiative to succeed. From 2018 to  
305 now, the CIRTLL Network has assumed all management of the MOOCs and MCLCs, with continued  
306 success.

307 Recent research shows that, while MOOC participation and completion rates have declined over the  
308 last five years, MOOCs designed for highly motivated students pursuing professional development  
309 have thrived [24]. Our findings are consistent with this trend and point to potential future uses of  
310 MOOCs and MCLCs for career and professional development needs. Asynchronous, online learning  
311 in conjunction with synchronous, in-person learning is a structure with potential to be effective in  
312 professional development domains beyond teaching, including leadership, conflict resolution,  
313 responsible conduct of research, and mentoring, as well as interdisciplinary domains such as data  
314 visualization or computational thinking. The fact that current STEM faculty also took our MOOCs  
315 and participated in MCLCs suggests that this structure might also be useful for early-career  
316 academics especially at institutions without faculty development programs, as long as they are  
317 structurally and geographically clustered. In this project, the CIRTl Network was instrumental, but  
318 other professional networks such as disciplinary societies, formal and informal, could serve similar  
319 design, support, dissemination, and sustainment functions.

320 We demonstrated the effective delivery of pedagogical professional development to future STEM  
321 faculty with the potential to significantly impact undergraduate STEM education across the United  
322 States. Our design combines flexible, asynchronous content in conjunction with optional, supported  
323 and facilitated in-person learning communities, all within the context of a national network of STEM  
324 faculty and educational developers. Our model can successfully be used in many contexts to  
325 overcome barriers where learners seek significant professional development in constrained  
326 settings.

## 327 **References and Notes**

- 328 [1] President's Council of Advisors on Science and Technology. (2012). Engage to excel: Producing  
329 one million additional college graduates with degrees in science, technology, engineering, and  
330 mathematics. Washington, DC.
- 331 [2] Freeman, S., Eddy, S., McDonough, M., Smith, M., Okoroafor, N., Jordt, H., & Wenderoth, M.  
332 (2014). Active learning increases student performance in science, engineering, and mathematics.  
333 *Proceedings of the National Academy of Science*, 111(23), 8410-8415.
- 334 [3] Eddy, S., & Hogan, K. (2014). Getting under the hood: How and for whom does increasing course  
335 structure work? *CBE—Life Sciences Education*, 13, 453-468.
- 336 [4] Ballen C.J., Wieman C., Salehi S., Searle J.B. and Zamudio K.R., 2017. Enhancing diversity  
337 in undergraduate science: Self-efficacy drives performance gains with active learning.  
338 *CBE—Life Sciences Education*, 16(4), p56. Pmid:29054921
- 339 [5] Theobald E.J., Hill M.J., Tran E., Agrawal S., Arroyo E.N., Behling S., et al., 2020. Active learning  
340 narrows achievement gaps for underrepresented students in undergraduate science, technology,  
341 engineering, and math. *Proceedings of the National Academy of Sciences*, 117(12), pp.6476–6483.
- 342 [6] Dewsbury BM, Swanson HJ, Moseman-Valtierra S, Caulkins J (2022) Inclusive and active  
343 pedagogies reduce academic outcome gaps and improve long-term performance. *PLoS ONE* 17(6):  
344 e0268620. <https://doi.org/10.1371/journal.pone.0268620>
- 345 [7] Light, G., Calkins, S., Luna, M., and Drane, D. , Assessing the impact of faculty development  
346 programs on faculty approaches to teaching. *The International Journal of Teaching and Learning in*  
347 *Higher Education* 2009. 20(2): p. 168-181.
- 348 [8] Connolly, M.R., Savoy, J. N., Lee, Y.-G., & Hill, L. B., Building a better future STEM faculty: How  
349 doctoral teaching programs can improve undergraduate education. 2016, University of Wisconsin-  
350 Madison: Madison, WI; Wisconsin Center for Education Research.



- 351 [9] Wright, M., Horii, C.V., Felten, P., Sorcinelli, M.D., and Kaplan, M. Faculty Development Improves  
352 Teaching and Learning. *POD Speaks* 2 (2018): 1-5.
- 353 [10] Gardner GE, Jones MG (2011). Pedagogical preparation of science graduate teaching assistant:  
354 challenges and implications. *Sci Educ* 20, 31-4
- 355 [11] Nyquist, J.D., L. Manning, D.H. Wulff, A.E. Austin, J. Sprague, P.K. Fraser, C. Calcagno, and B.  
356 Woodford. 1999. On the road to becoming a professor: the graduate student experience. *Change:*  
357 *the Magazine of Higher Learning* 31:18-27.
- 358 [12] Brownell SE, Tanner KD (2012). Barriers to faculty pedagogical change: lack of training, time,  
359 incentives, and ... tensions with professional identity?. *CBE Life Sci Educ* 11, 339-346.
- 360 [13] Thiry, H., Laursen, S. L., & Liston, C. (2007). (De)Valuing teaching in the academy: Why are  
361 underrepresented graduate students overrepresented in teaching and outreach? *Journal of Women*  
362 *and Minorities in Science and Engineering* 13(4), 391-419. DOI:  
363 10.1615/JWomenMinorScienEng.v13.i4.50
- 364 [14] Prevost, L.B., C.E. Vergara, M. Urban-Lurain, and H. Campa III. 2017. Evaluation of a high-  
365 engagement teaching program for STEM graduate students: outcomes of the FAST-Future  
366 Academic Scholars in Teaching Fellowship Program. *Innovative Higher Education*. 42
- 367 [15] Shortlidge EE, Eddy SL (2018) The trade-off between graduate student research and teaching:  
368 A myth?. *PLOS ONE* 13(6): e0199576. <https://doi.org/10.1371/journal.pone.0199576>
- 369 [16] Austin, A. E., Campa III, H., Pfund, C., Gillian-Daniel, D. L., Mathieu, R., & Stoddart, J. (2009).  
370 Preparing STEM doctoral students for future faculty careers. *New Directions for Teaching and*  
371 *Learning*, 117, 83–95.
- 372 [17] S. C. Hokanson, S. Grannan, R. Greenler, D. L. Gillian-Daniel, H. Campa III, & B. B. Goldberg, “A  
373 Study of Synchronous, Online Professional Development Workshops for Graduate Students and  
374 Postdocs Reveals the Value of Reflection and Community Building,” *Innovative Higher Education*  
375 volume 44, pages385–398 (2019). <https://doi.org/10.1007/s10755-019-9470-6>

- 376 [18] Mathieu, R.D., A. Austin, K.A. Barnicle, H. Campa III, and C. McLinn. 2020. The Center for The  
377 Integration of Research, Teaching, and Learning: A national network to prepare STEM Future  
378 faculty. Pages 45-53 in K. Saichaie and C.H. Theisen, Editors. Special Issue: Approaches to Graduate  
379 Student Instructor Development and Preparation. *New Directions in Teaching and Learning*  
380 Number 163. Jossey-Bass. <https://doi.org/10.1002/tl.20416>
- 381 [19] Garrison, D. R, Anderson, K., and Archer, W. (2000) Critical Inquiry in a Text-Based  
382 Environment: Computer Conferencing in Higher Education. *The Internet and Higher Education* 2(2-  
383 3): 87±105 ISSN: 1096-7516
- 384 [20] McDaniels, M., Pfund, C., & Barnicle, K. (2016). Creating dynamic learning communities in  
385 synchronous online courses. *Online Learning*, 20(1), 110-129.
- 386 [21] Wenger, Etienne (1998). *Communities of Practice: Learning, Meaning, and Identity*. Cambridge:  
387 Cambridge University Press.
- 388 [22] Vitomir Kovanović, Dragan Gašević, Srećko Joksimović, Marek Hatala, Olusola Adesope,  
389 Analytics of communities of inquiry: Effects of learning technology use on cognitive presence in  
390 asynchronous online discussions, *The Internet and Higher Education*, Volume 27, 2015, Pages 74-  
391 89, ISSN 1096-7516, <https://doi.org/10.1016/j.iheduc.2015.06.002>
- 392 [23] Pappano, L. (2012, November 2). The year of the MOOC. *New York Times*.
- 393 [24] Reich, J., Ruipérez-Valiente, J. A., (2019). The MOOC pivot. *Science* 11 Jan, Vol. 363, Issue 6423,  
394 pp. 130-131 DOI: 10.1126/science.aav 7958
- 395 [25] Johns Hopkins University. (2014, January 14). Hopkins creates free online course to equip PhD  
396 candidates with teaching skills [Press release]. Retrieved from  
397 <https://hub.jhu.edu/2014/01/24/university-teaching-101-coursera/>
- 398 [26] Bruff, D., Fisher, D., McEwen, K., & Smith, B. (2012). Wrapping a MOOC: Student perceptions of  
399 an experiment in blended learning. *Journal of Online Learning and Teaching*, 9(2).

- 400 [27] Sarah Blum-Smith, Maxwell M. Yurkofsky, Karen Brennan, Stepping back and stepping in:  
401 Facilitating learner-centered experiences in MOOCs, *Computers & Education*, Volume 160, 2021,  
402 104042, ISSN 0360-1315, <https://doi.org/10.1016/j.compedu.2020.104042>.
- 403 [28] Jordan, K. (2014). Initial trends in enrollment and completion of massive open online courses.  
404 *The International Review of Research in Open and Distance Learning* 134-160.
- 405 [29] Jordan, K. (2015). Massive open online course completion rates revisited: assessment, length,  
406 and attrition. Retrieved from [www.irrodl.org/index.php/irrodl/article/view/21123340](http://www.irrodl.org/index.php/irrodl/article/view/21123340)
- 407 [30] The Michigan State University Institutional Review Board reviewed our project at its outset  
408 (letter dated 09/26/14) and determined that our project was course evaluation and not human  
409 subjects research and deemed exempt, so written consent was not required for surveys and  
410 interviews. Nevertheless, all participant surveys and interviews were explicitly voluntary.
- 411 [31] Tseng, S.-F., Tsao, Y.-W., Yu, L.-C., Chan, C.-L., & Lai, K. R. (2016). Who will pass? Analyzing  
412 learner behaviors in MOOCs. *Research and Practice in Technology Enhanced Learning*, 11(1), 8.  
413 <https://doi.org/10.1186/s41039-016-0033-5>
- 414 [32] Perna, L. W., Ruby, A., Boruch, R. F., Wang, N., Scull, J., Ahmad, S., & Evans, C. (2014). Moving  
415 Through MOOCs: Understanding the Progression of Users in Massive Open Online Courses.  
416 *Educational Researcher*, 43(9), 421–432. <https://doi.org/10.3102/0013189X14562423>
- 417 [33] Kizilcec, R. F., Piech, C., & Schneider, E. (2013). Deconstructing disengagement: analyzing  
418 learner subpopulations in massive open online courses (p. 170). ACM Press.  
419 <https://doi.org/10.1145/2460296.2460330>
- 420 [34] These statistics are based on post-survey respondents to all seven instances of the  
421 Introductory course.
- 422 [35] 33% of post-survey respondents reported participating in an MCLC, and 96% were learners in  
423 the course.

424 [36] Golde, C.M. & Dore, T.M. (2001). At Cross Purposes: What the experiences of doctoral students  
425 reveal about doctoral education ([www.phd-survey.org](http://www.phd-survey.org)).  
426 [37] Mervis, J. Science 02 Jan 2009: Vol. 323, Issue 5910, pp. 54-58; DOI:  
427 10.1126/science.323.5910.54

## 428 **Acknowledgments**

429  
430 We gratefully acknowledge our many colleagues that contributed to this effort by developing MOOC  
431 modules or content to components of modules. We specifically would like to thank (in alphabetical  
432 order): C. Brame, S. Chasteen, M. DiPietro, C. Fata-Hartley, A. Little, J. Littrell, R. M. Mathieu, T.  
433 McMahon, and K. Spilios, for their many critical contributions.

434  
435 **Funding:** This work was supported by the National Science Foundation under grant number DGE  
436 1347605.

437 **Author contributions:** Proposed and secured financial support (BBG, DB, HC, KB); developed  
438 MOOC content and structure (LEPC, CM, BBG, DB, HC, KB, NHG, RG, TC), built and/or managed  
439 courses on edX and Coursera (LEPC, AS, BBG, DB, HC, KB, NHG, RG, TC), prepared MCLC Facilitators  
440 guides (BBG, DB, HC, KB, NHG, RG), analyses (SL, MF, CM, AS, BBG, DB, HC, KB, NHG, RG), prepared  
441 the manuscript (SL, MF, CM, AS, BBG, DB, HC, KB, NHG, RG)

442 SLL interviewed MCLC and institutional leaders, analyzed data, and contributed to the manuscript.

443 One sentence: We've prepared tens of thousands of future STEM faculty to use evidence-based  
444 instruction through a MOOC in conjunction with hundreds of supported and facilitated in-person  
445 (now virtual) learning communities that provide flexibility for learners and leverage the clustered  
446 nature of our target demographic.

447

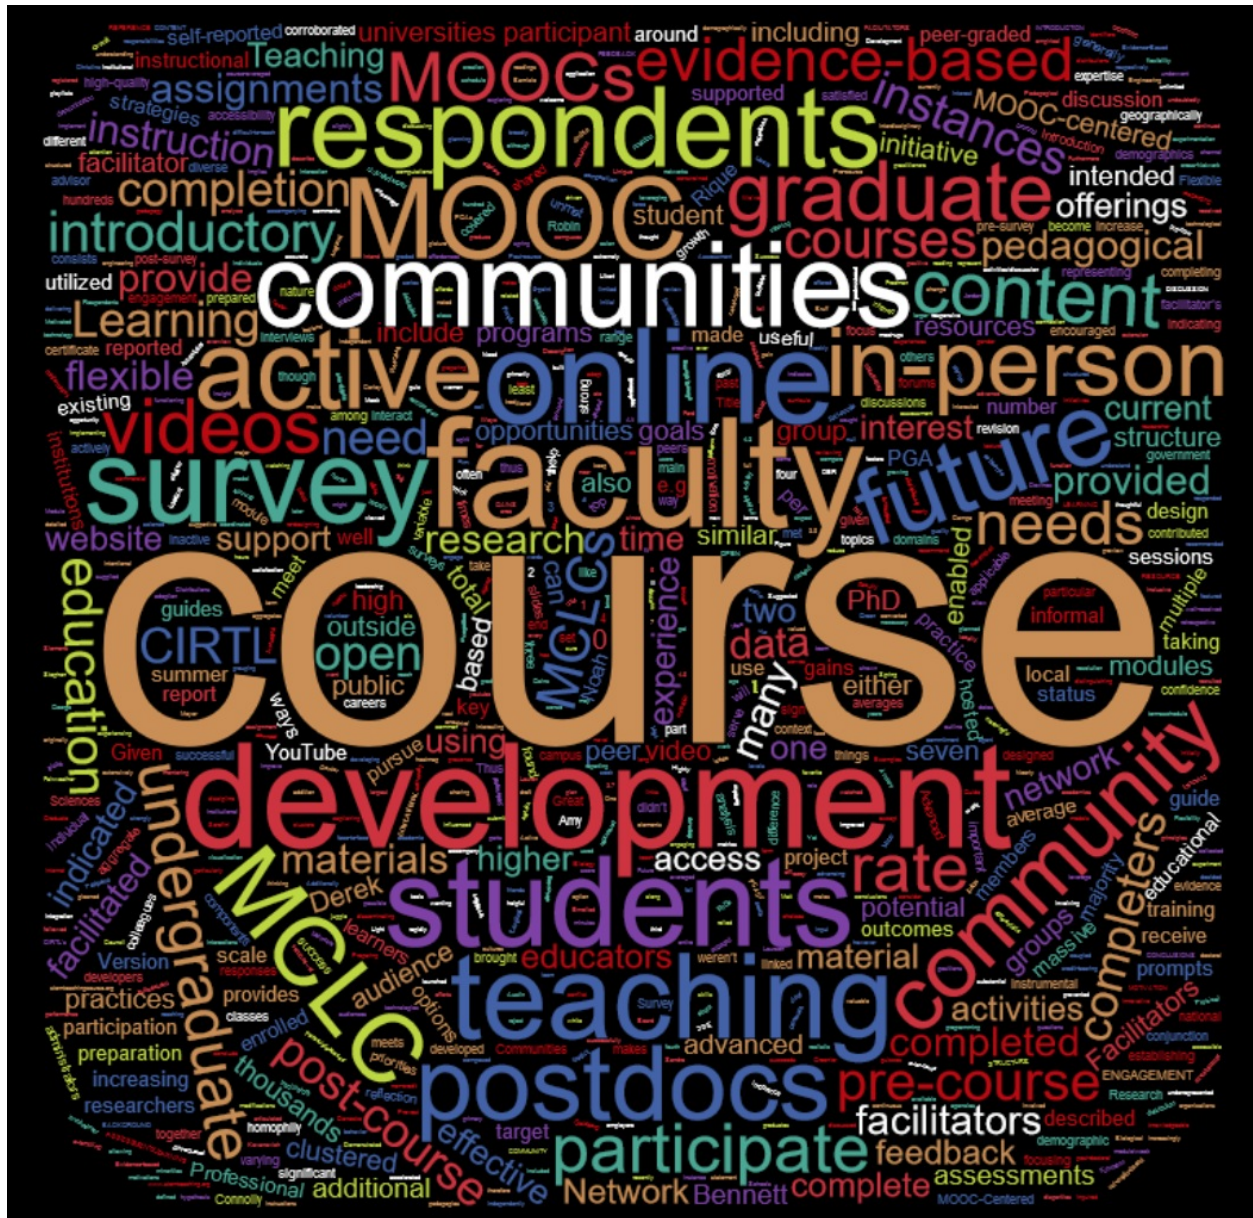

448

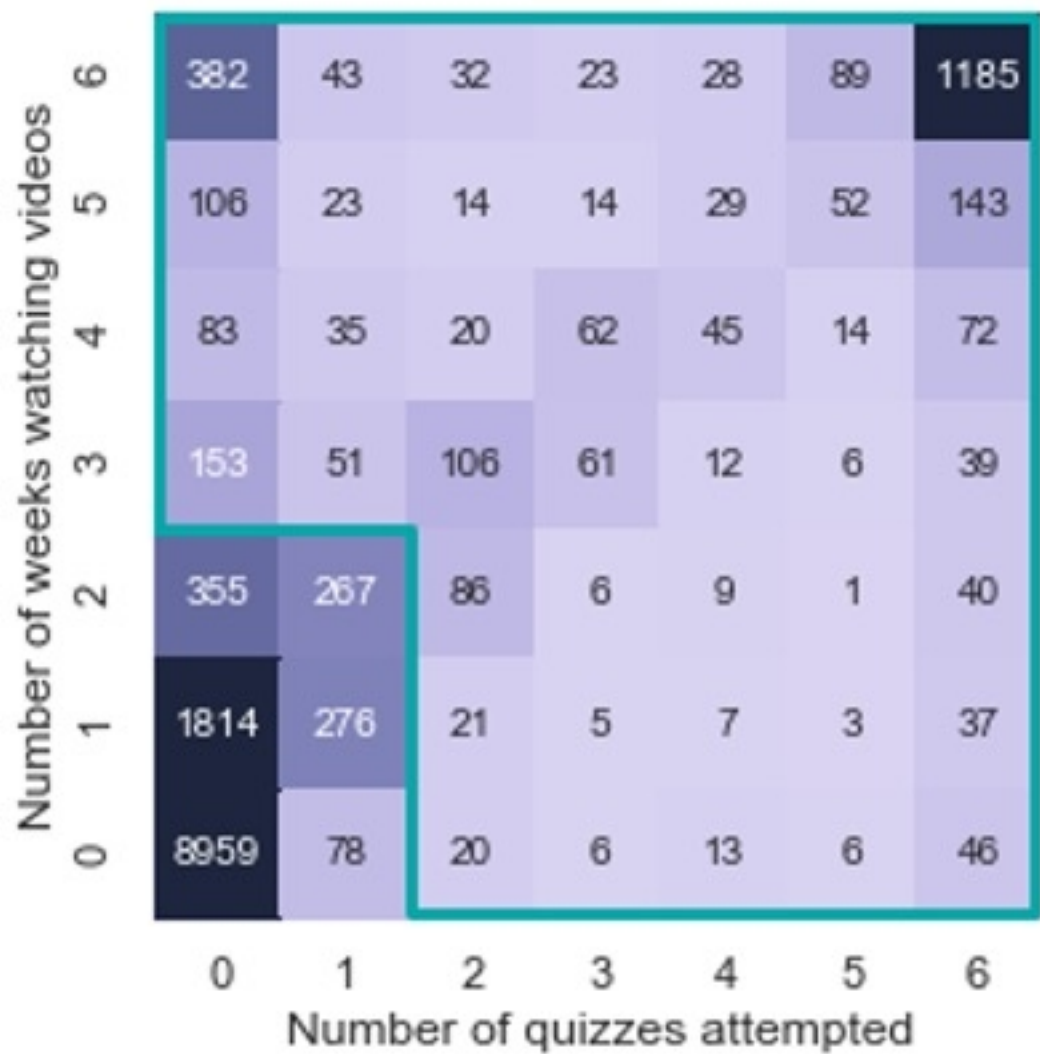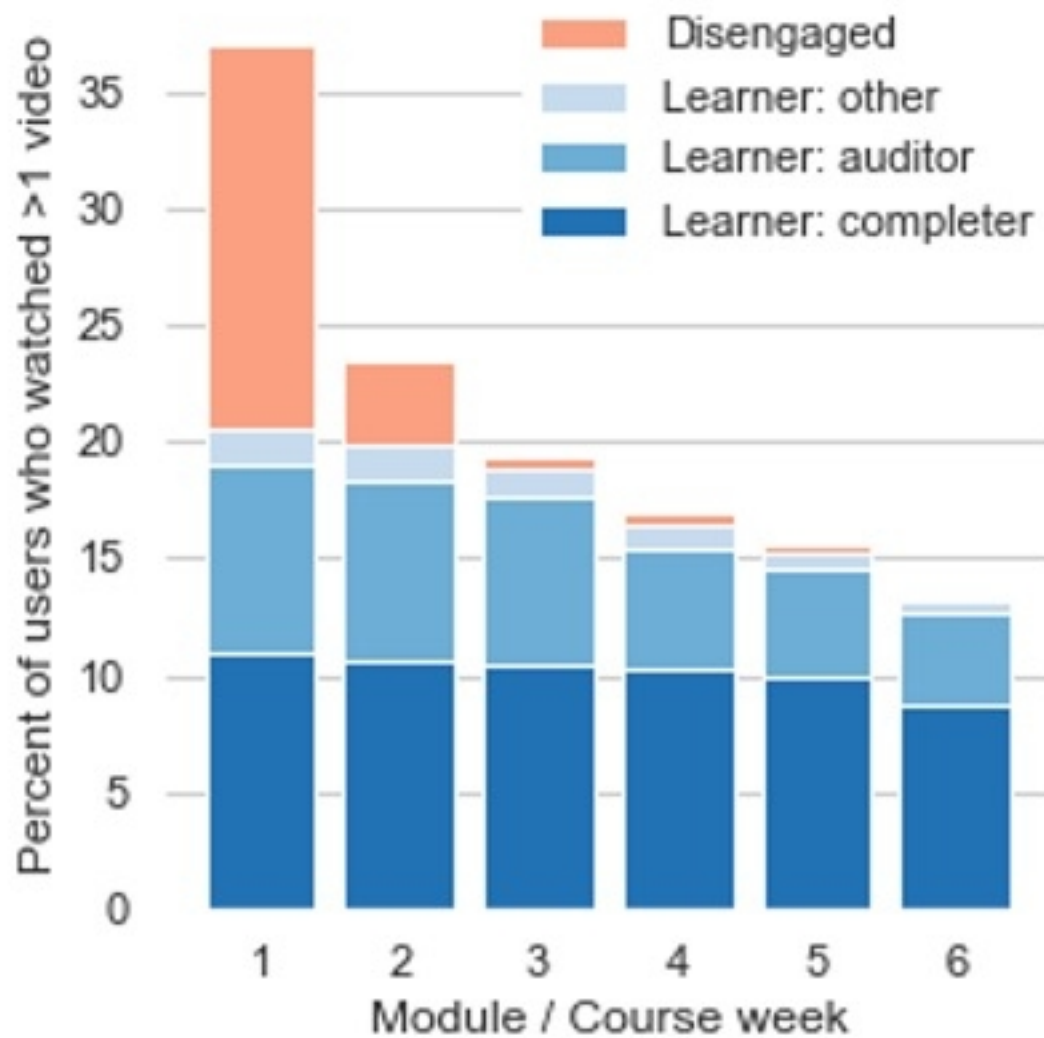

Figure

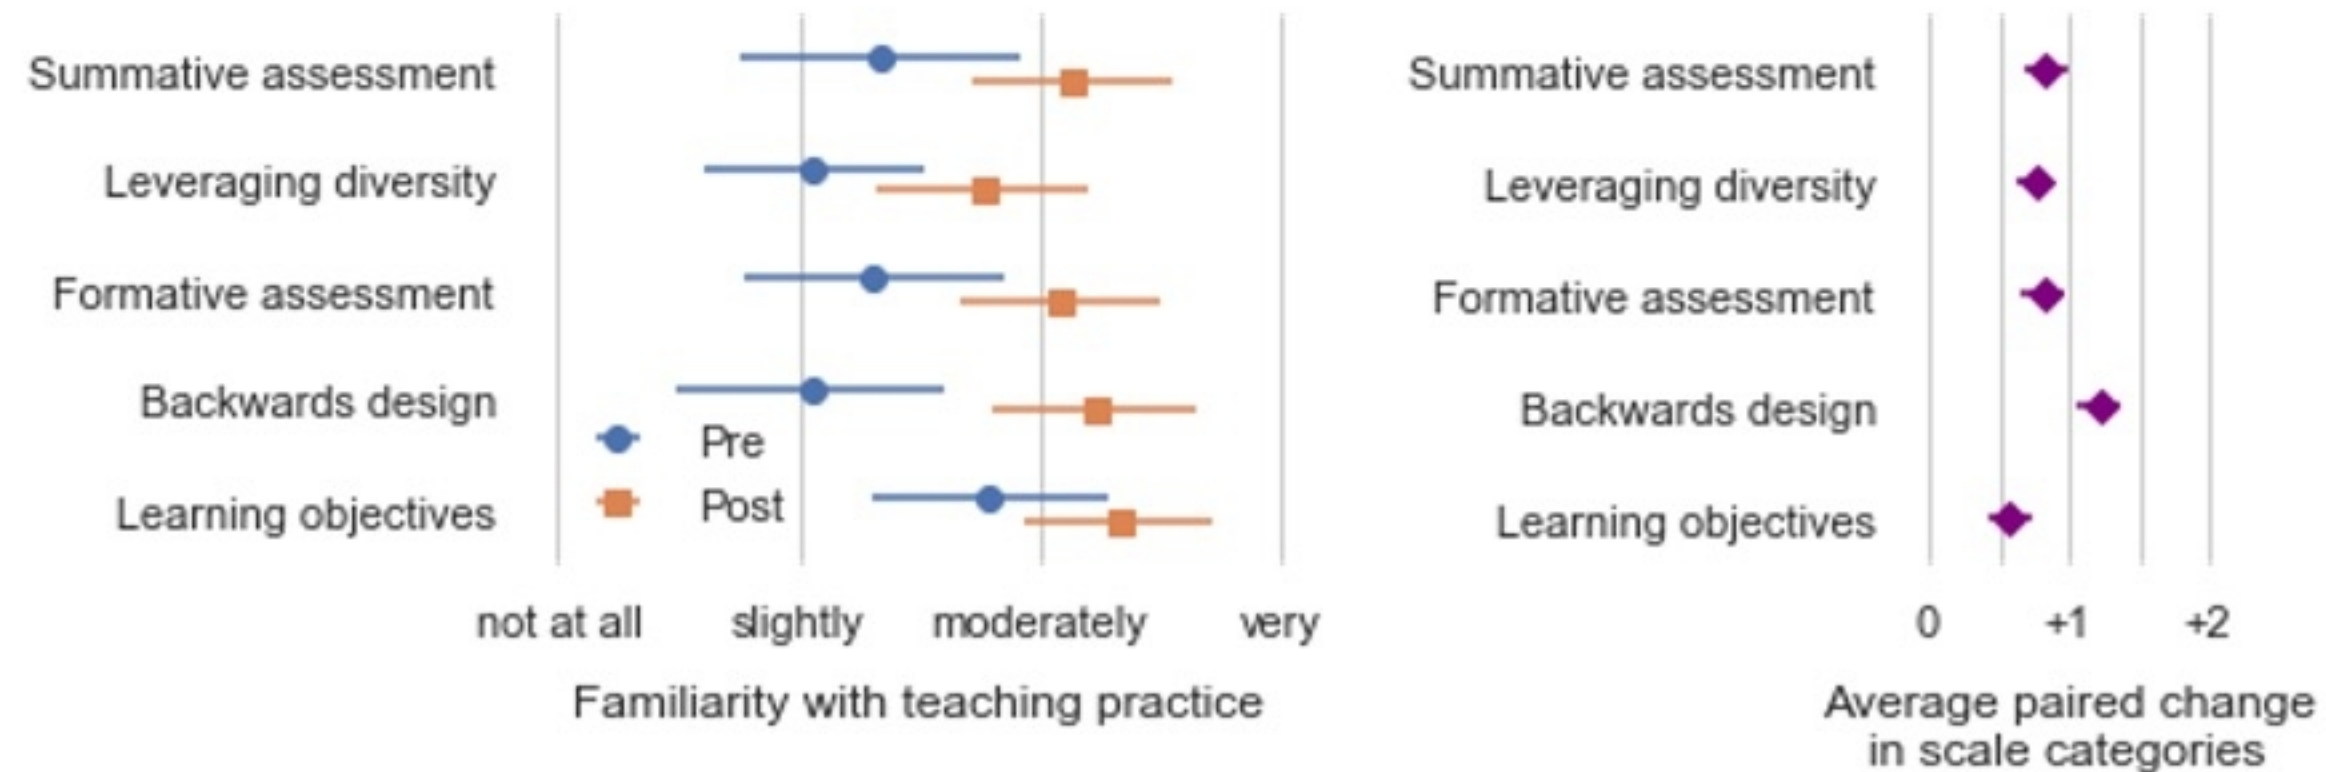

Figure

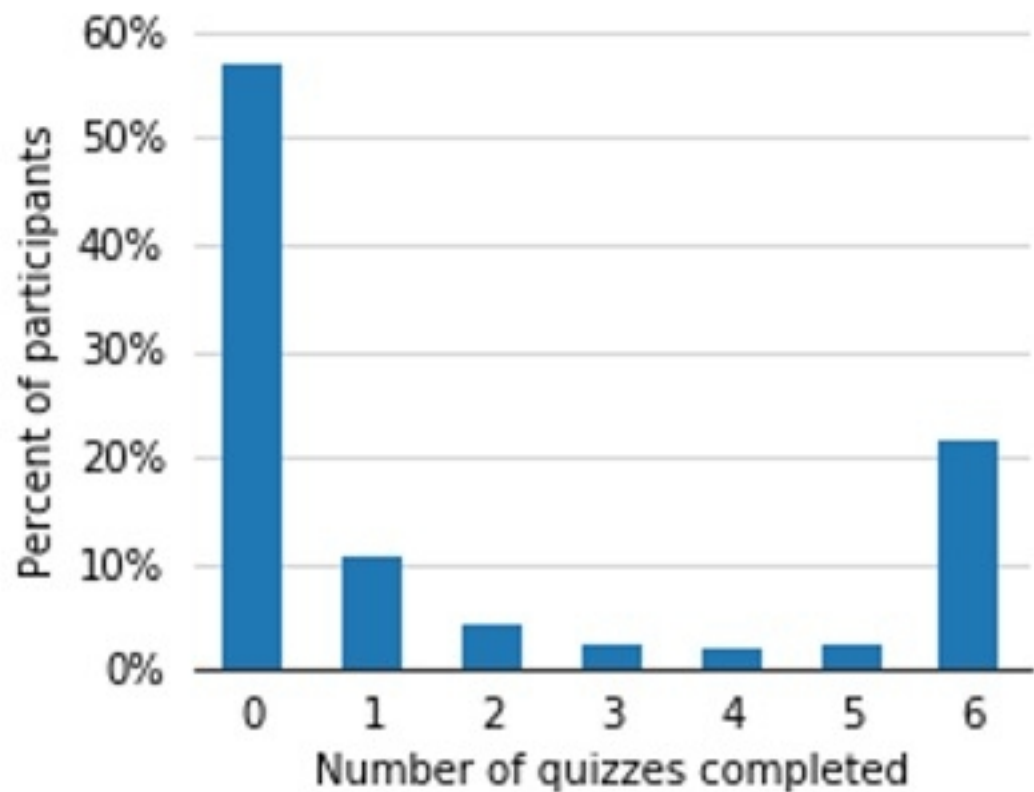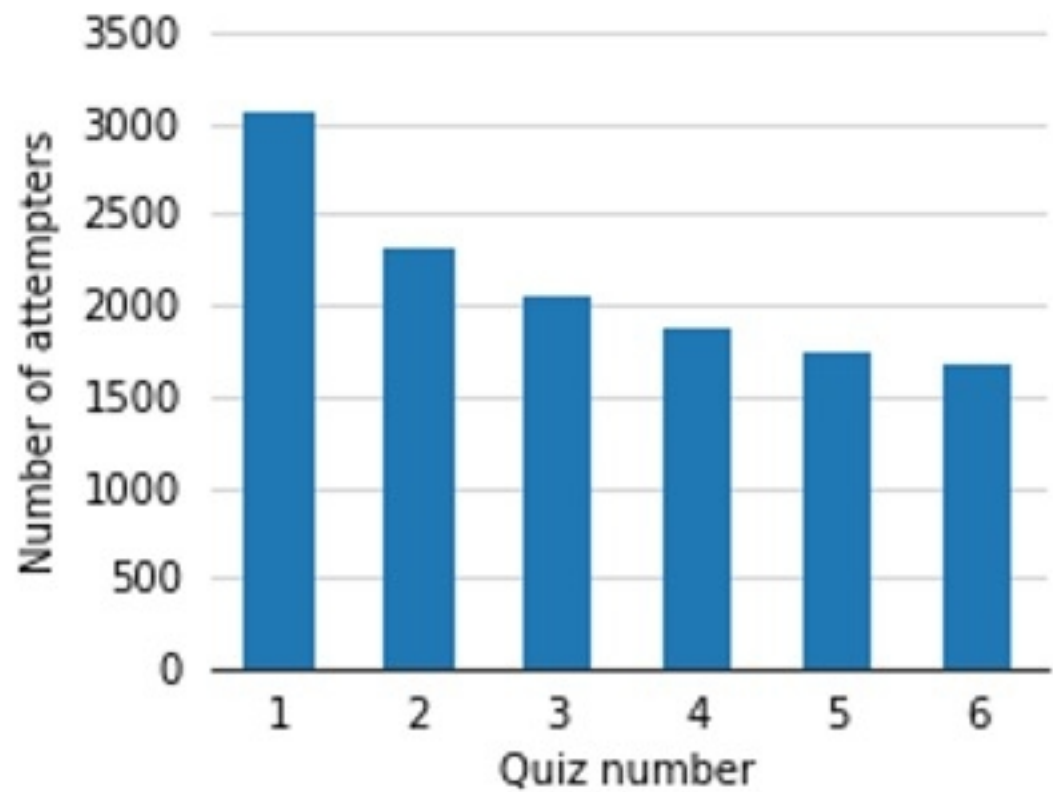

Figure



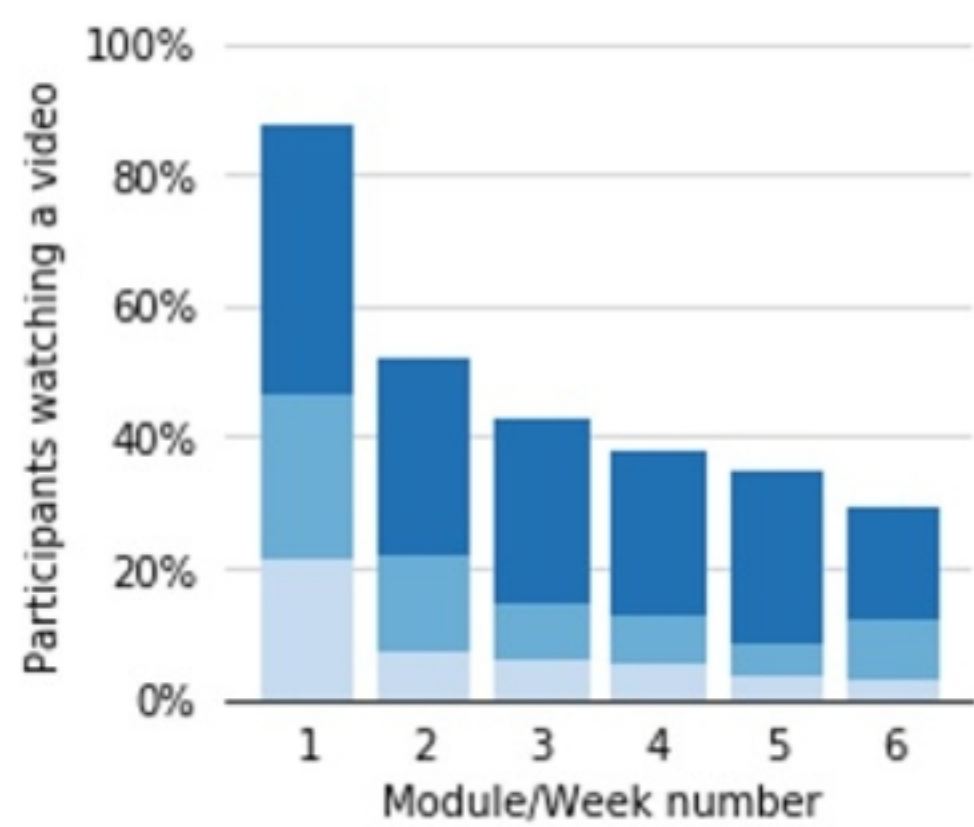

Percent of module videos watched

■ > 80% of videos

■ 20%-80% of videos

■ > 0 and < 20% of videos

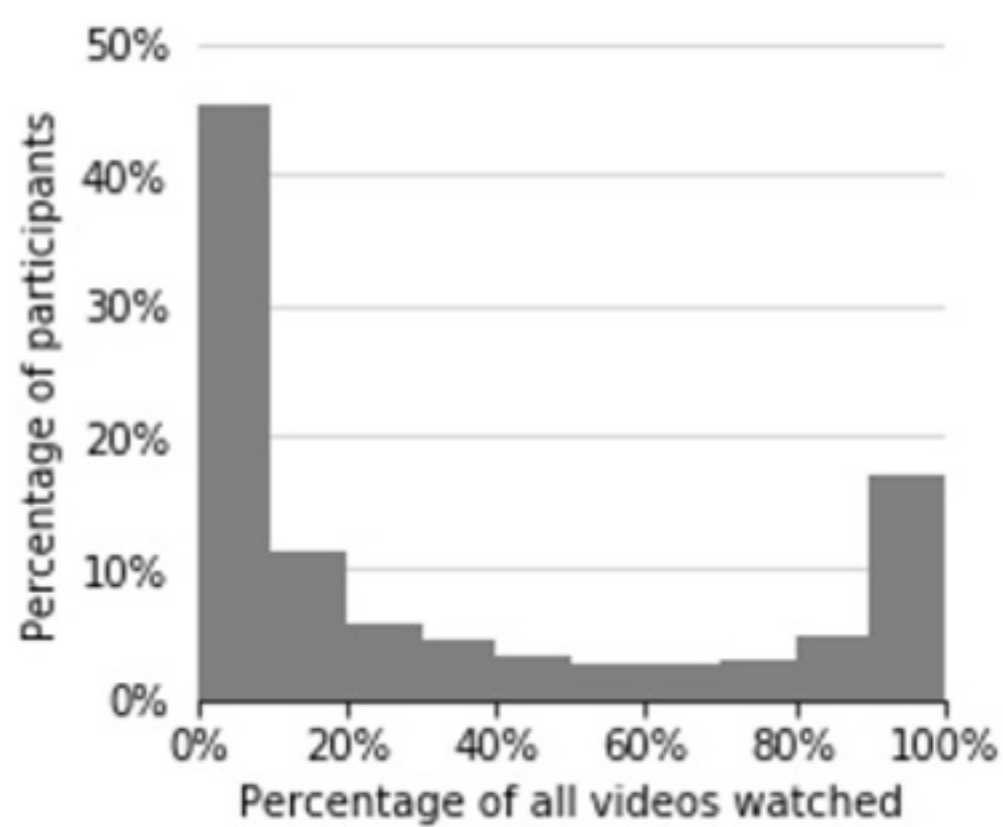

Figure

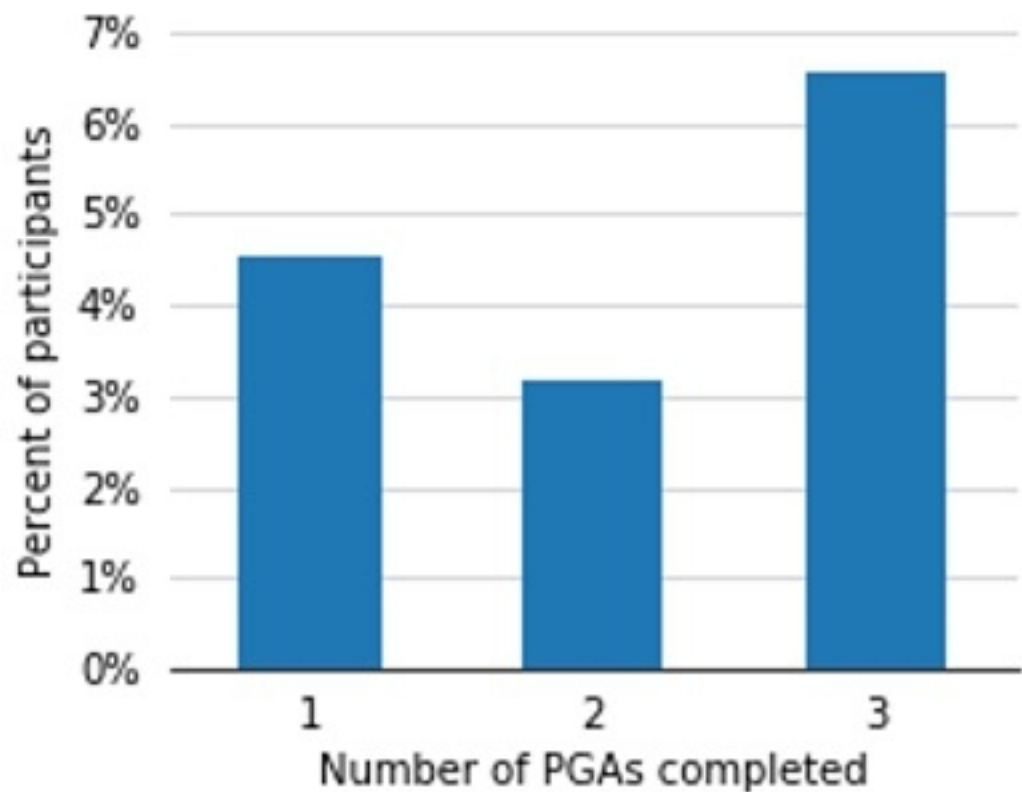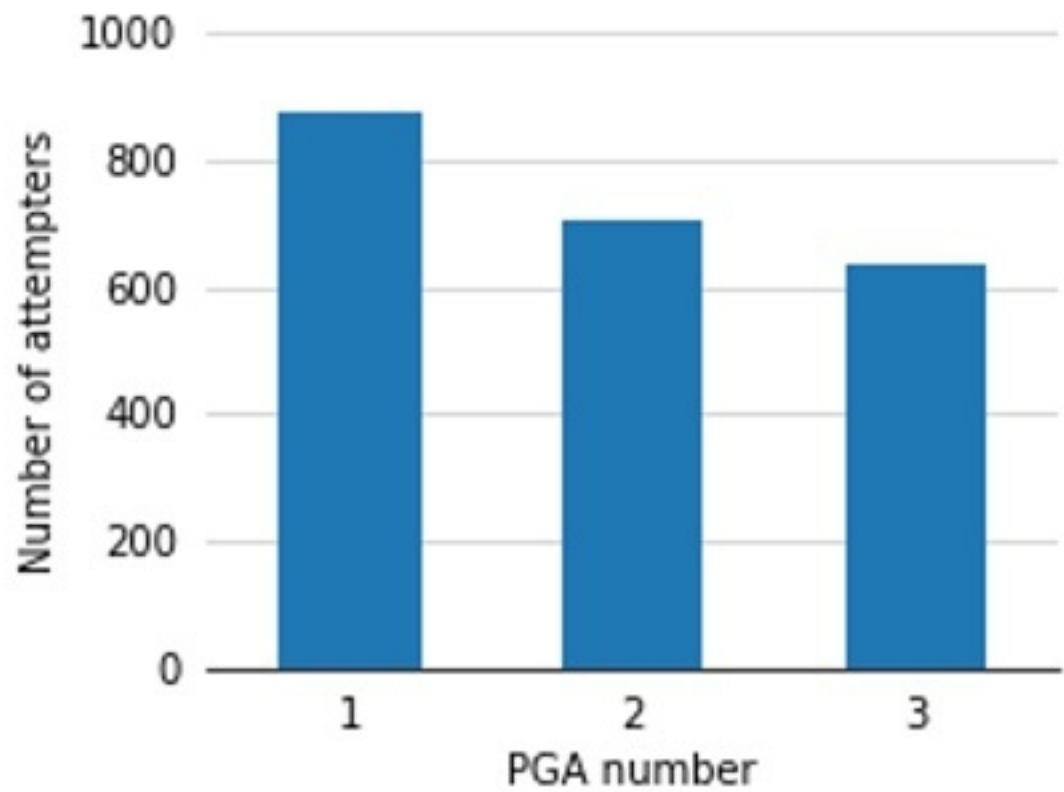

Figure

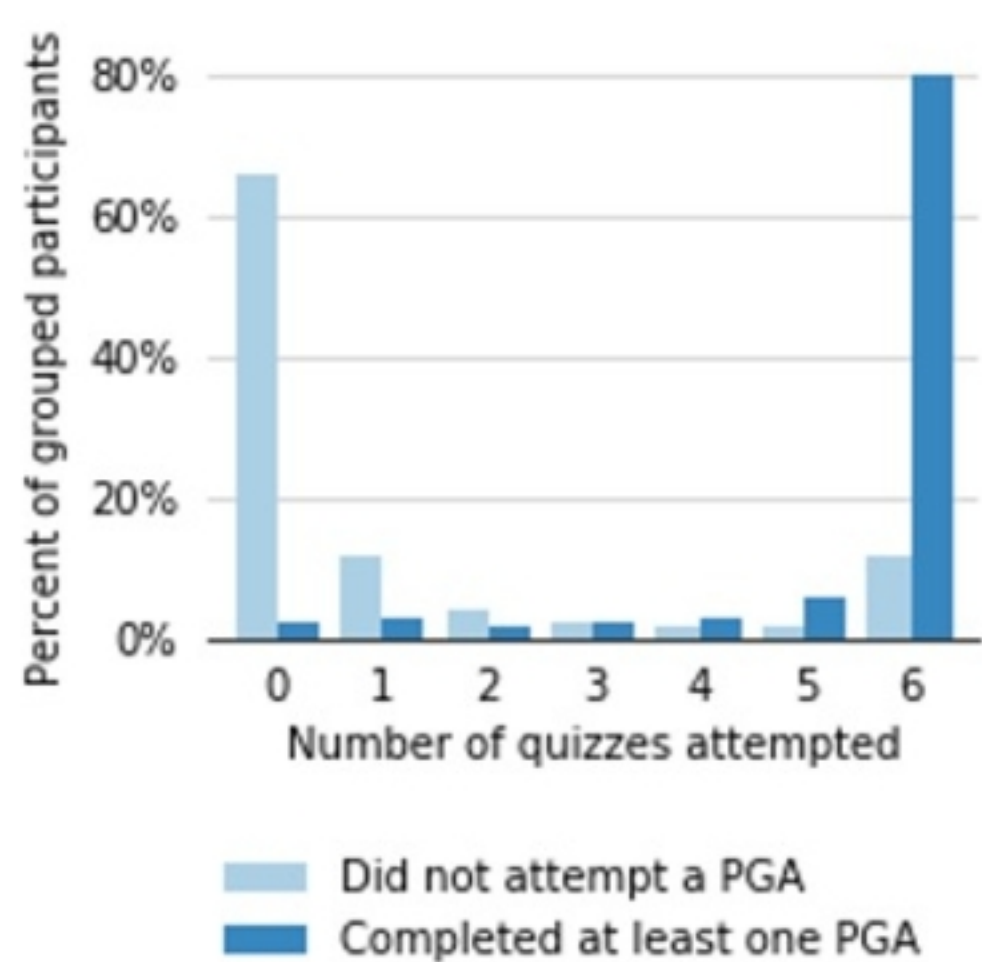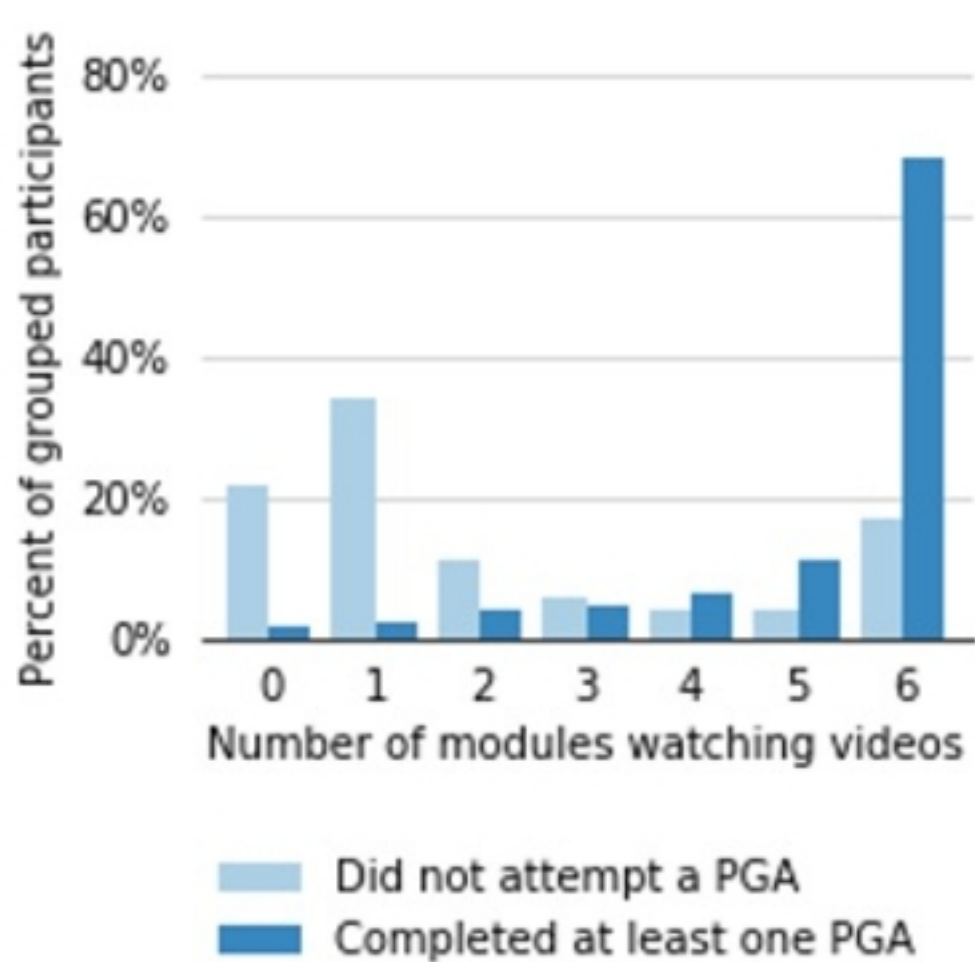

Figure

>2 video modules

>1 quiz

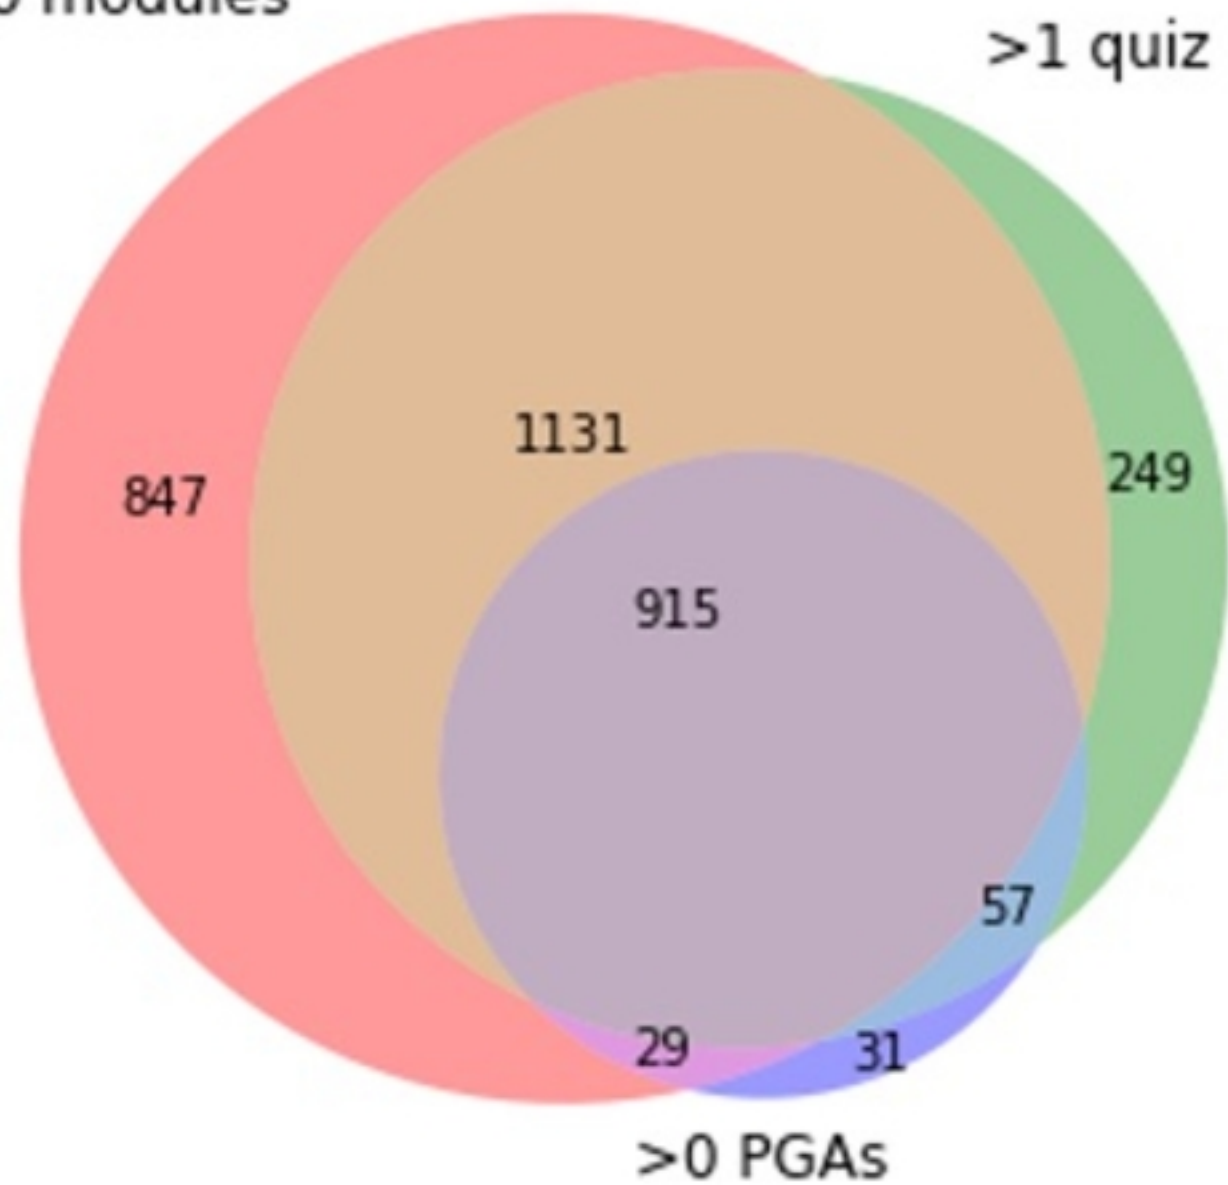

Figure

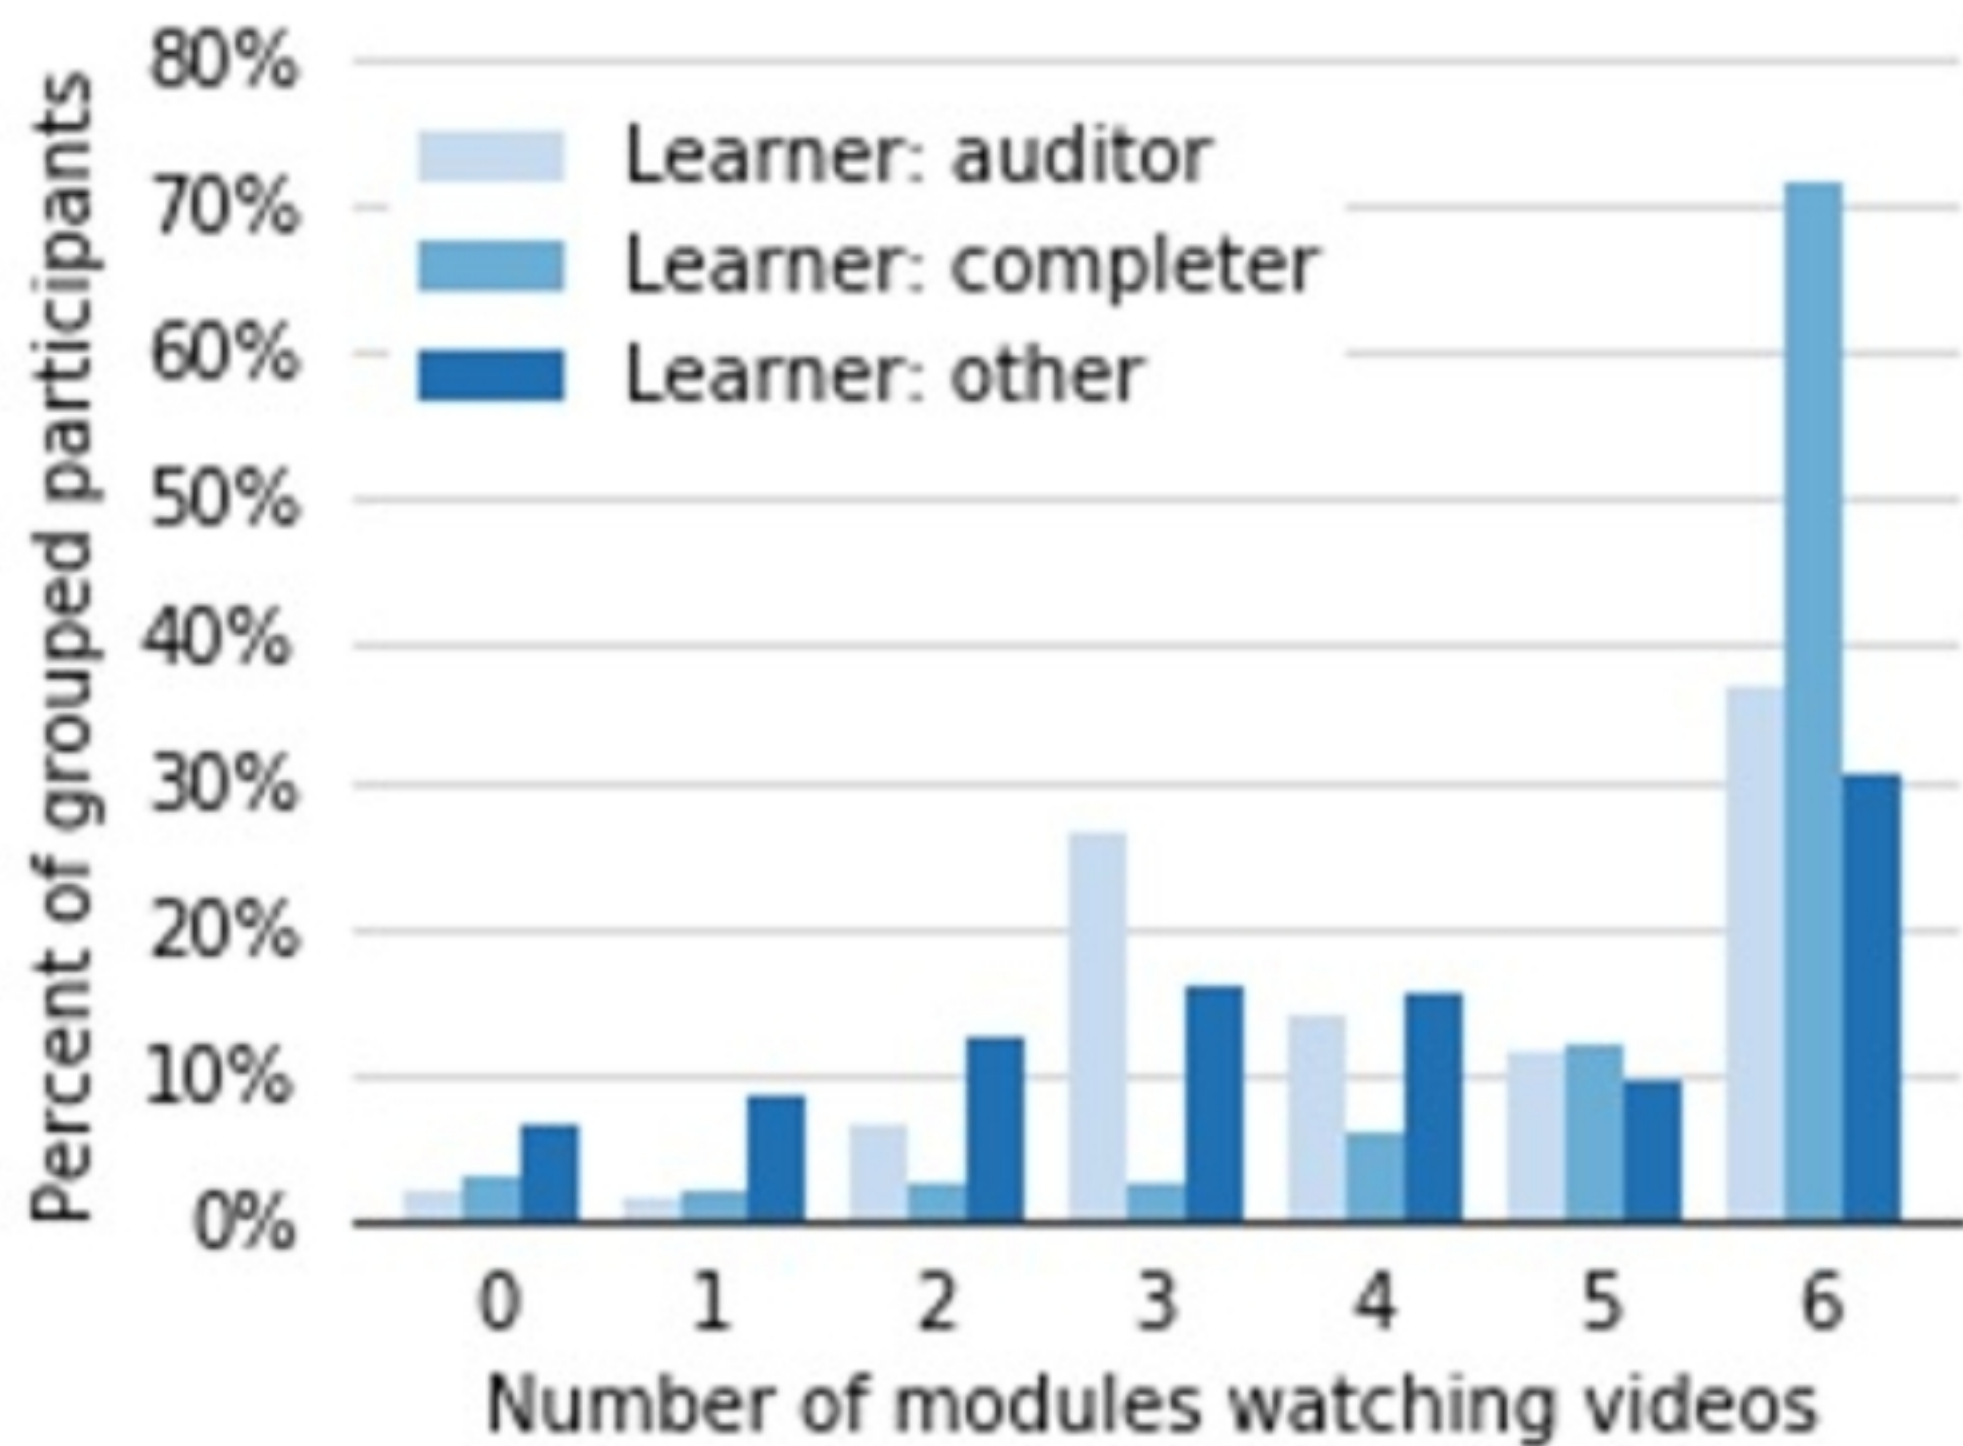

Figure

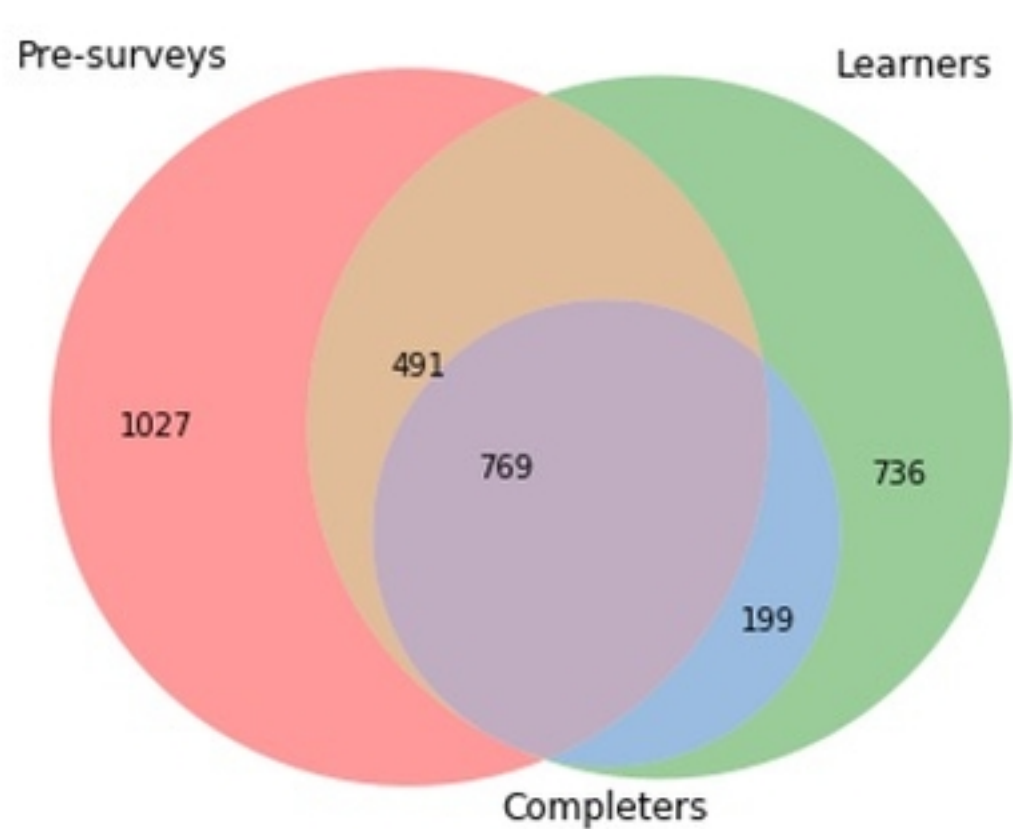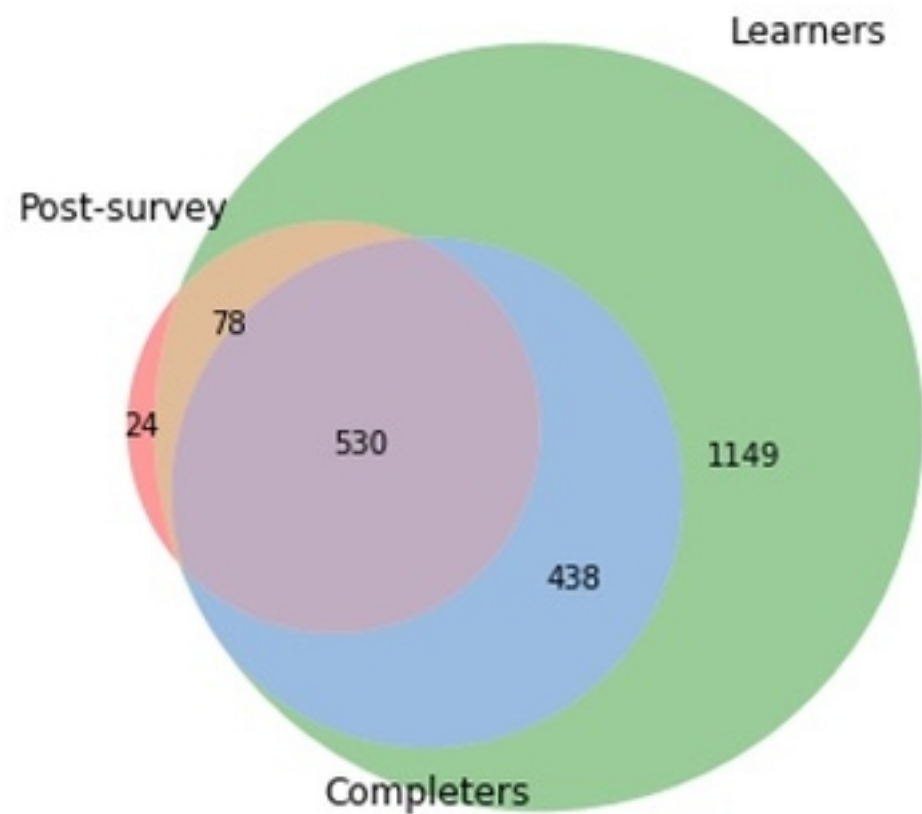

Figure

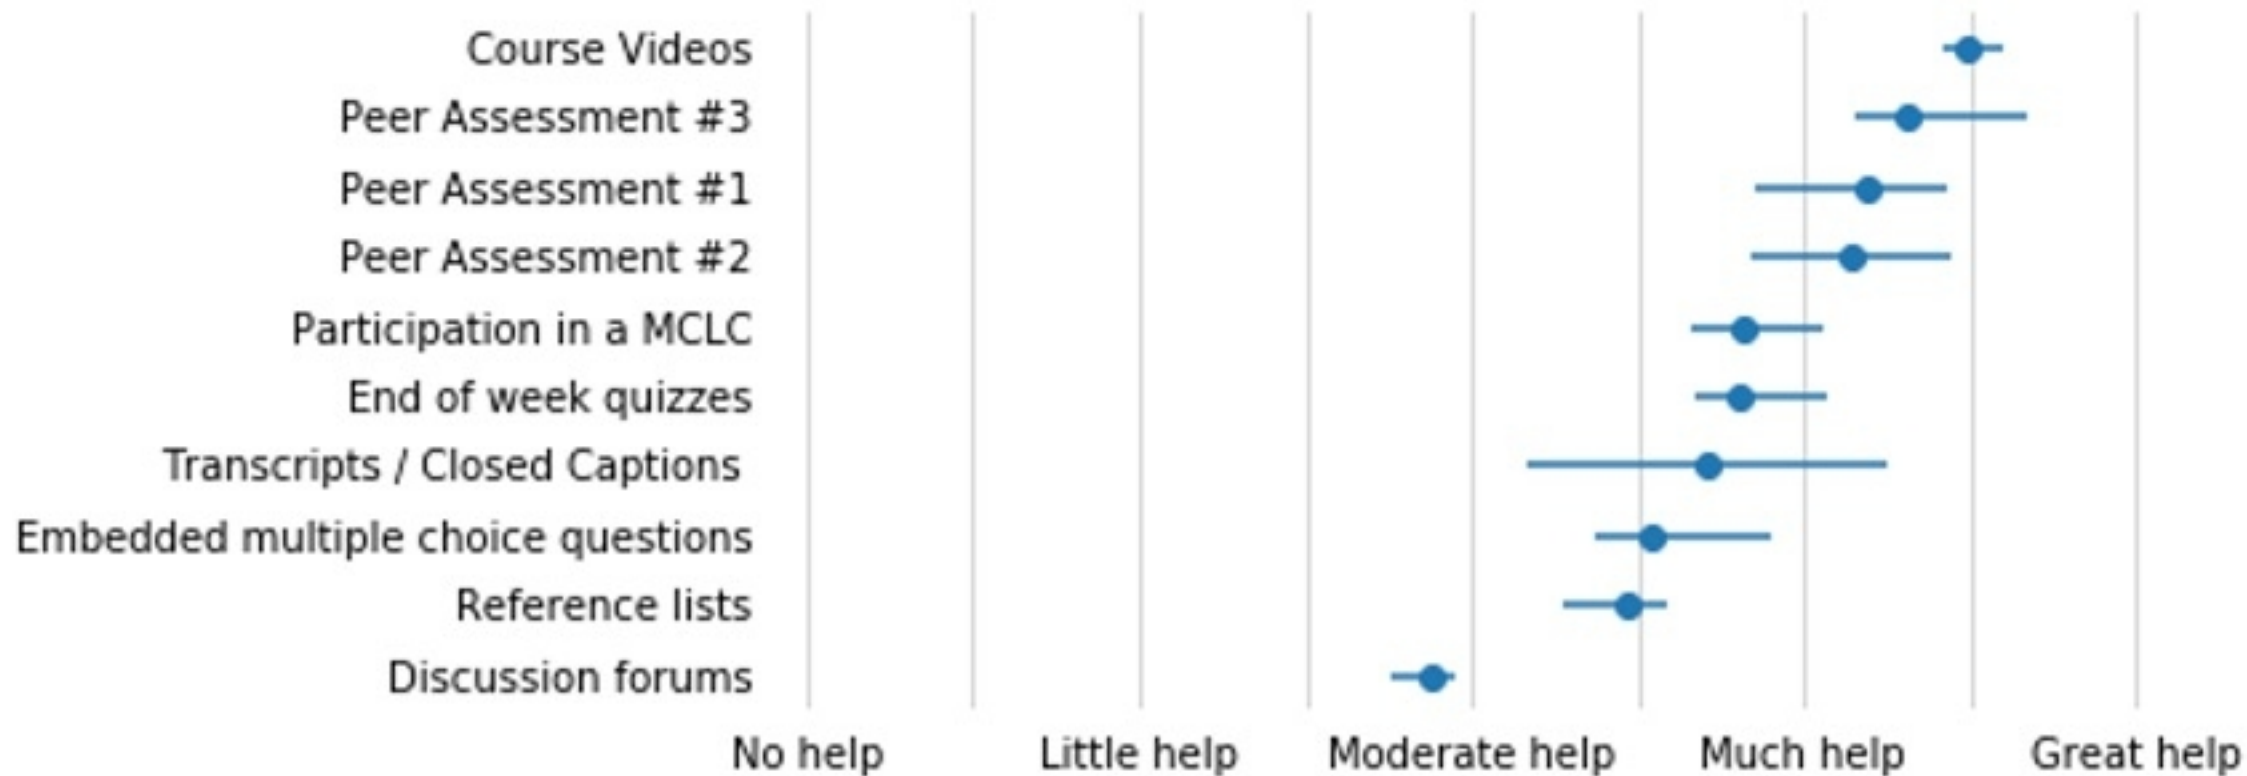

Figure

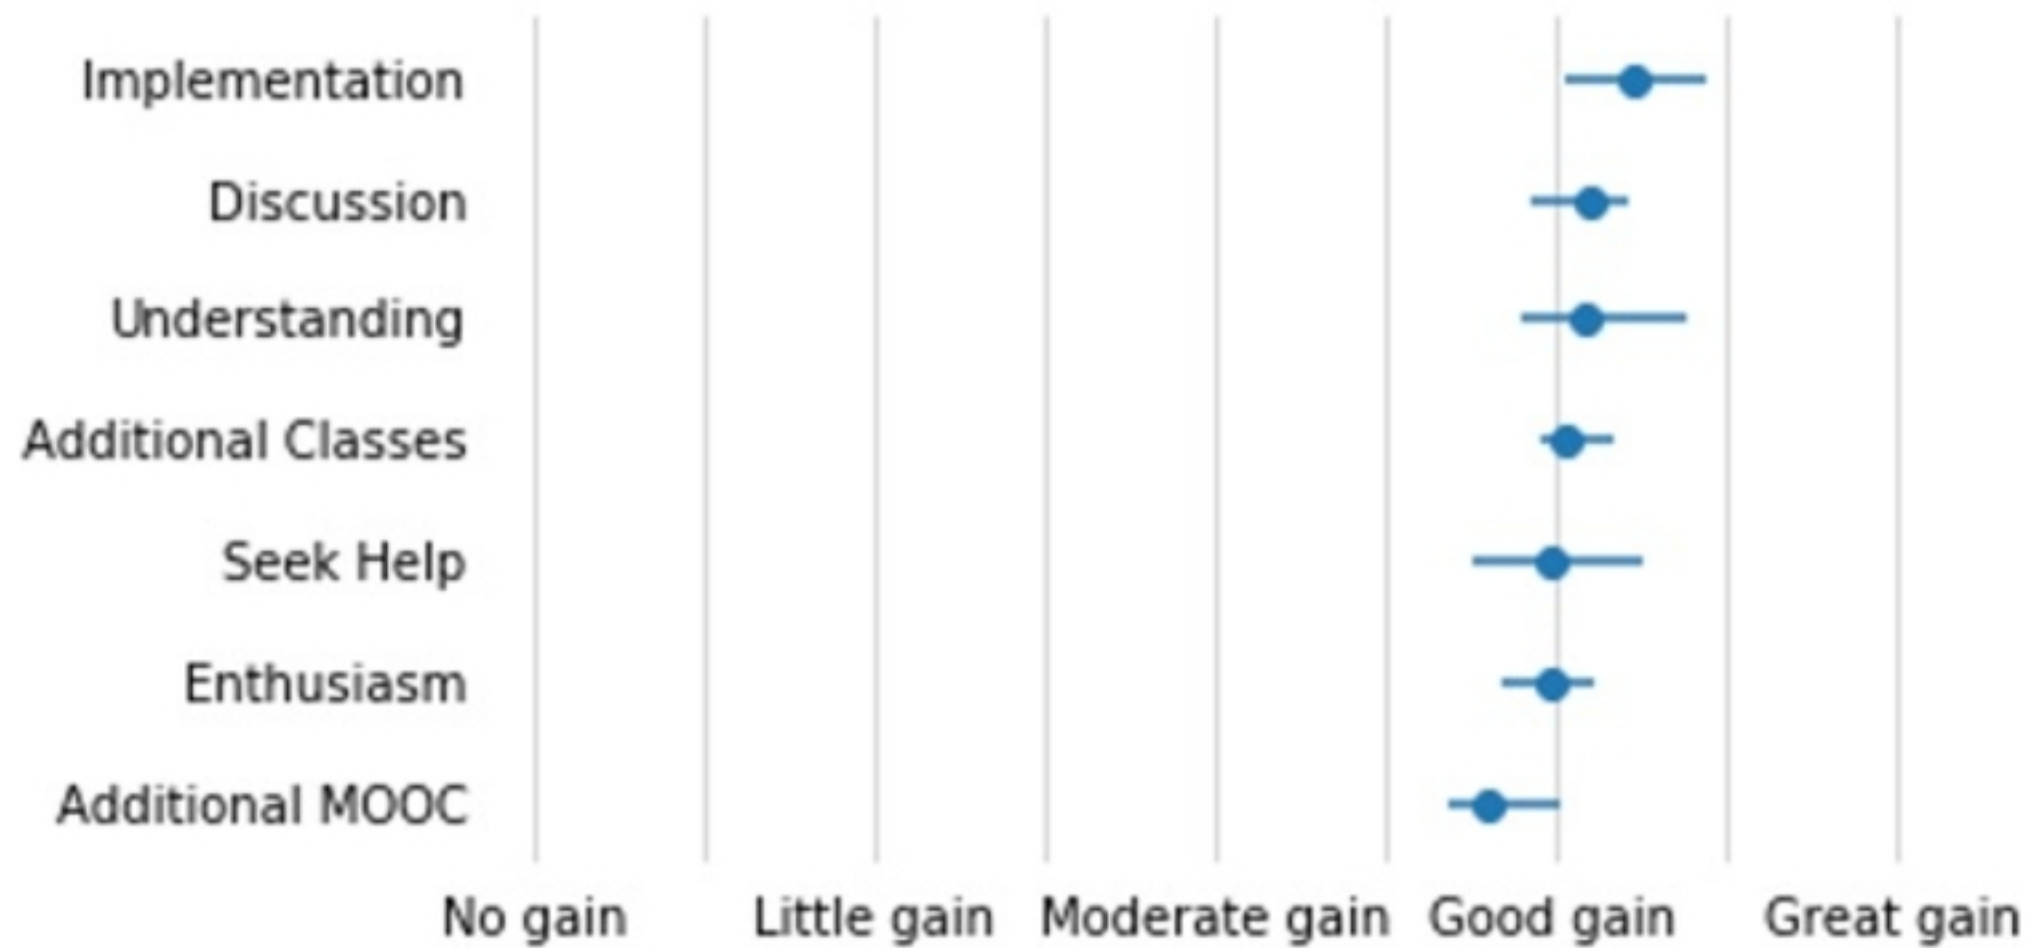

Figure



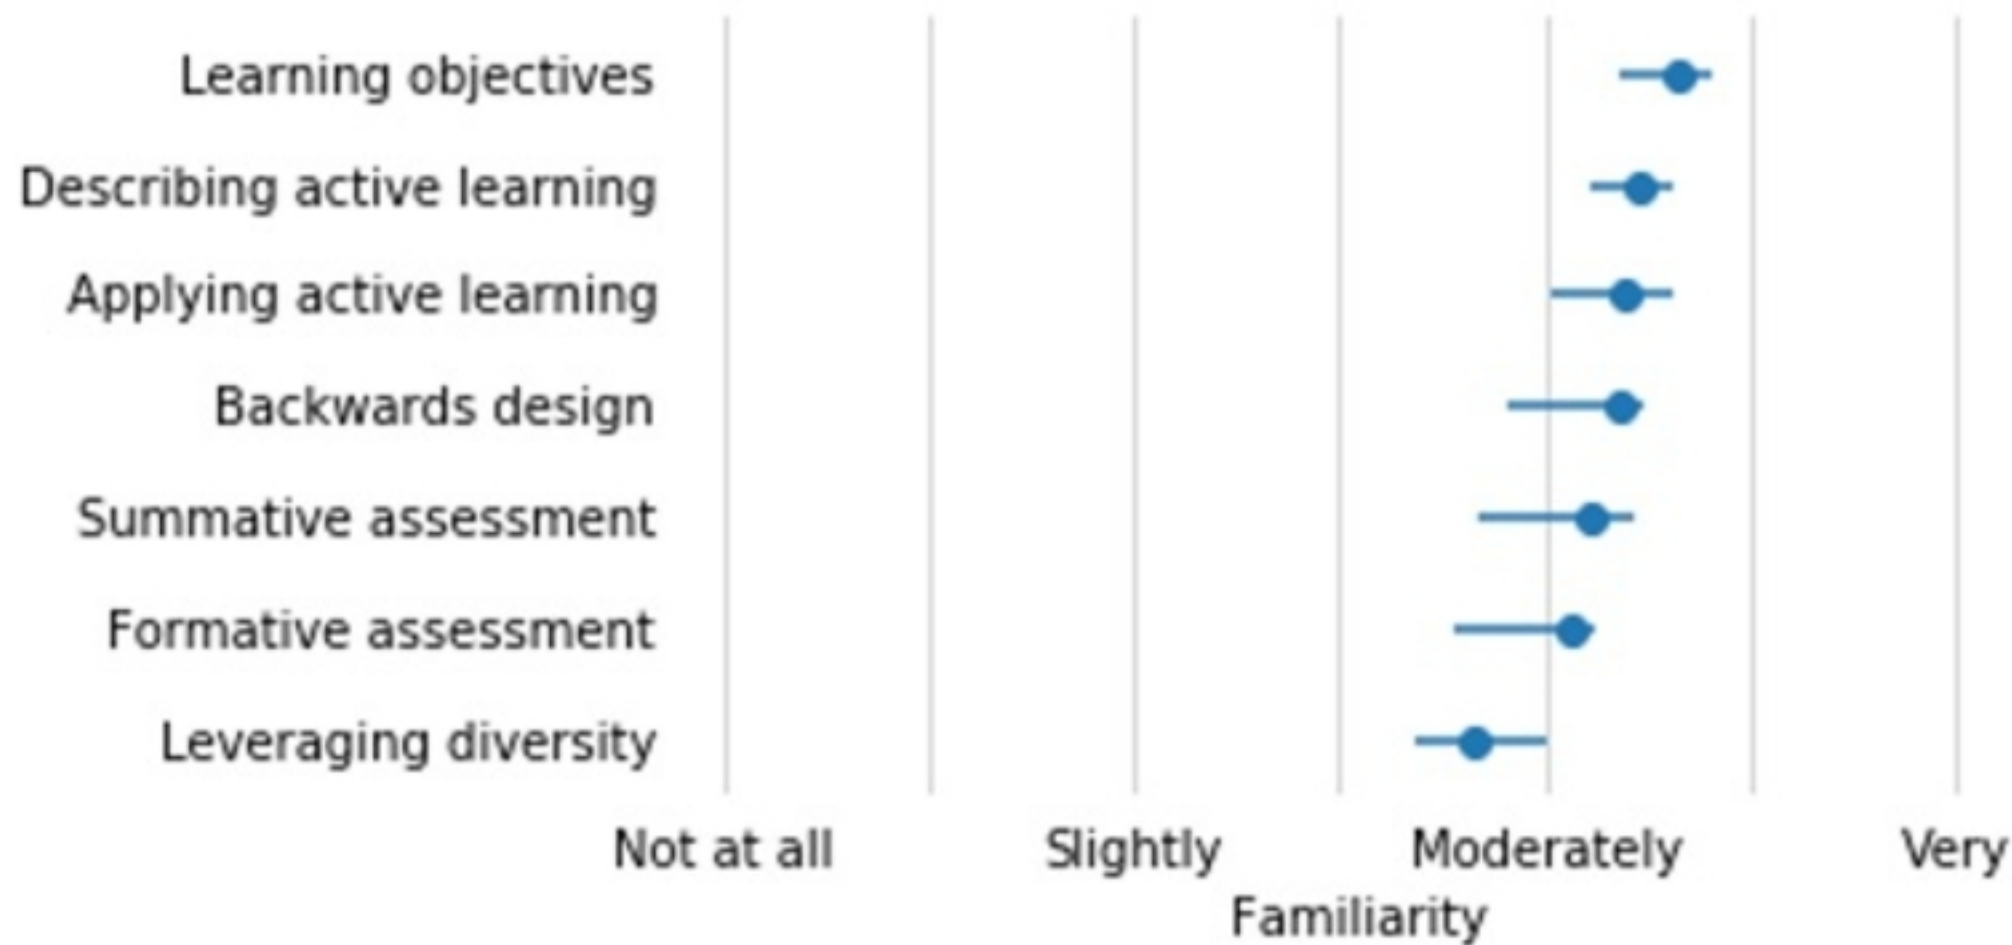

Figure
